# Supplementary material for: 3D Printer Rentals: Technical Service Design and Pricing for Customers of Varying Expertise
Source: Atypon-hosted journal article supplement (doi:10.1287/msom.2024.1563), 2025-12-15
Supplement: msom.2024.1563.sm3.pdf [file msom.2024.1563.sm3.pdf]

# Additional Materials for “3D Printer Rentals: Technical Service Design and Pricing for Customers of Varying Expertise” by Yue Zhang and Brian Tomlin

## Rationale behind Proposition 3(v) (the OEM profit can decrease in $\Delta e$ )

We note that two-item is optimal in this case, i.e., both segments are retained as prosumers. By 19, and the optimal profit, given by 19, is  $\Pi(\alpha_M^*, \mathbf{r}_M^*) = (1 - \tau)\Phi(\underline{e} - \frac{\tau}{1-\tau}\Delta e) + \tau\Phi(\bar{e})$ . The fact that the profit delivered by the elementary segment is driven by the pseudo expertise  $\underline{e} - \frac{\tau}{1-\tau}\Delta e$ , in contrast to the true expertise  $\underline{e}$  under user-based strategy (see 13). This means that, as  $\Delta e$  increases, the gain in profit from the advanced segment cannot, in some circumstances, offset the reduction in profit from the elementary segment. Therefore the optimal profit can decrease in  $\Delta e$ . To understand this more deeply, consider the necessary condition in Proposition 3(v) for the optimal profit to initially decrease in  $\Delta e$ , that is,  $e_m > e_f - c'(0)$ . When this holds, the elementary segment’s pseudo expertise  $\underline{e} - \frac{\tau}{1-\tau}\Delta e$  is sufficiently high for small  $\Delta e$  that the optimal two-item package offers no technical service to either segment, and hence  $\Phi(\cdot)$  is linear over the region  $[\underline{e} - \frac{\tau}{1-\tau}\Delta e, \bar{e}]$ . Note that  $\Pi(\alpha_M^*, \mathbf{r}_M^*) = (1 - \tau)\Phi(e_m - (\frac{1}{2} + \frac{\tau}{1-\tau})\Delta e) + \tau\Phi(e_m + \frac{1}{2}\Delta e)$ . As  $\Delta e$  grows with  $e_m$  fixed, the profit gain from the advanced segment (initially when  $\Delta e$  is small) cannot offset the profit reduction from the elementary segment, and thus the OEM profit can decrease in  $\Delta e$ . This decreasing behavior never occurs in the user-based strategy because there the profit delivered by the elementary segment is driven by their true expertise  $\underline{e}$  with  $\Pi(\{\alpha_S^*(e), r_S^*(e) | e \in \{\underline{e}, \bar{e}\}\}) = (1 - \tau)\Phi(e_m - \frac{1}{2}\Delta e) + \tau\Phi(e_m + \frac{1}{2}\Delta e)$ . Hence, in the region where  $\Phi(\cdot)$  is linear, an increase in  $\Delta e$  has no impact on the profit.

## Rationale behind Proposition 4 (iii) ( $V_C$ can decrease in $\Delta e$ )

When  $\Phi(\underline{e} - \frac{\tau}{1-\tau}\Delta e) < 0$ , recall that the value of customization is the profit delivered by the elementary segment in the user-based strategy. In this case,  $V_C$  decreases in the range  $\Delta e$ , because the profit from the elementary segment decreases in its own expertise, and this expertise declines in  $\Delta e$  for any given  $e_m$ . When  $\Phi(\underline{e} - \frac{\tau}{1-\tau}\Delta e) \geq 0$ ,  $V_C$  increases in  $\Delta e$  when  $\Delta e$  is small but decreases in  $\Delta e$  when  $\Delta e$  exceeds the threshold in Proposition 4 (iii). Recall that in the population-based strategy a two-item package is optimal if  $\Phi(\underline{e} - \frac{\tau}{1-\tau}\Delta e) \geq 0$  and that the OEM effectively treats the elementary segment as if their expertise is  $\underline{e} - \frac{\tau}{1-\tau}\Delta e$ , whereas in the user-based strategy the OEM acts on their true expertise  $\underline{e}$ . Therefore, at a high enough  $\Delta e$ , the optimal technical service level for the elementary segment in the population-based strategy has reached its maximum (one), whereas

the optimal technical service in the user-based strategy is less than the maximum. Therefore, as  $\Delta e$  increases further, the profit gain from the elementary segment no longer changes under the population-based strategy but continues to decrease under the user-based strategy, resulting in a reduced value of customization.

## Imperfect Self-assessment of Innate Expertise

The main model can also be extended to allow inaccurate self-assessment of expertise levels by customers. Specifically, for a customer of type  $e$ , instead of perfectly knowing his/her innate expertise level  $e$ , the customer's self-assessment can be an imperfect estimation of the true expertise and hence contain errors. Denote the imperfect estimate as  $\tilde{e} := e + \varsigma$ , where  $\varsigma$  is a random error term. As a result, the consumer-or-prosumer choice (see §4) for this customer will be based on  $\tilde{e}$  rather than  $e$ , i.e., the resulting utility given by (1) in Lemma 1 now becomes

$$\tilde{U}_{\mathcal{P}}(\boldsymbol{\alpha}, \mathbf{r}|e) := \begin{cases} \varepsilon(\alpha_H, \tilde{e}) - r_H & \text{if } \tilde{e} < e_f - \frac{\Delta r}{\Delta \alpha} \cdot \mathbb{1}_{\{\Delta \alpha > 0\}}, \\ \varepsilon(\alpha_L, \tilde{e}) - r_L & \text{otherwise.} \end{cases}$$

For user-based strategy, instead of solving the original problem (3), the OEM now needs to also account for customer's imperfect self-assessment in maximizing the gain from him/her:

$$\begin{aligned} \max_{(\boldsymbol{\alpha}(e), \mathbf{r}(e)) \in \mathcal{G}} \quad & E_{\varsigma} \left\{ (r_H - c(\alpha_H)) \mathbb{1}_{\{\tilde{e} < e_f - \frac{\Delta r}{\Delta \alpha} \cdot \mathbb{1}_{\{\Delta \alpha > 0\}}\}} + (r_L - c(\alpha_L)) \mathbb{1}_{\{\tilde{e} \geq e_f - \frac{\Delta r}{\Delta \alpha} \cdot \mathbb{1}_{\{\Delta \alpha > 0\}}\}} \right\}, \\ \text{s.t.} \quad & \tilde{U}_{\mathcal{P}}(\boldsymbol{\alpha}(e), \mathbf{r}(e)|e) \geq U_C. \end{aligned}$$

For population-based strategy, the OEM's original problem (4) now becomes

$$\max_{(\boldsymbol{\alpha}, \mathbf{r}) \in \mathcal{G}} E_{\varsigma} \left\{ (r_H - c(\alpha_H)) \cdot \tilde{d}_{\mathcal{P}_H}(\boldsymbol{\alpha}, \mathbf{r}) + (r_L - c(\alpha_L)) \cdot \tilde{d}_{\mathcal{P}_L}(\boldsymbol{\alpha}, \mathbf{r}) \right\},$$

where  $\tilde{d}_{\mathcal{P}_H}(\boldsymbol{\alpha}, \mathbf{r}) := \int_{e_o}^{\max\{e_o, e_f - \frac{\Delta r}{\Delta \alpha} \cdot \mathbb{1}_{\{\Delta \alpha > 0\}}\}} E_{\varsigma} \left( \mathbb{1}_{\{\tilde{U}_{\mathcal{P}}(\boldsymbol{\alpha}, \mathbf{r}|e) \geq U_C\}} \right) dZ(e)$  and  $\tilde{d}_{\mathcal{P}_L}(\boldsymbol{\alpha}, \mathbf{r}) := \int_{\mathcal{E}} E_{\varsigma} \left( \mathbb{1}_{\{\tilde{U}_{\mathcal{P}}(\boldsymbol{\alpha}, \mathbf{r}|e) \geq U_C\}} \right) dZ(e) - \tilde{d}_{\mathcal{P}_H}$ . Both problems can be analyzed in a similar way as for the main model. Moreover, if  $E(\varsigma) = 0$ , i.e., the customer population is overall unbiased in self-assessing, all our results and insights from the main model will carry over.

## Additional Plots for Online Appendix B

### Numerical Study for Truncated Normal Distribution of Population Expertise

Consider when the customer population expertise follows a truncated normal distribution on  $[\underline{e}, \bar{e}]$ . Like uniform, truncated normal also implies a continuum of expertise levels, i.e., it is not as concentrated as a two-point distribution. Meanwhile, it is more heavily distributed close to its mean and thus is not as spread out as uniform distribution. Let  $\mu$  and  $\sigma$  be the mean and standard deviation for the untruncated normal distribution. We consider  $\mu = e_m$  and  $\sigma = \Delta e/6$ , which

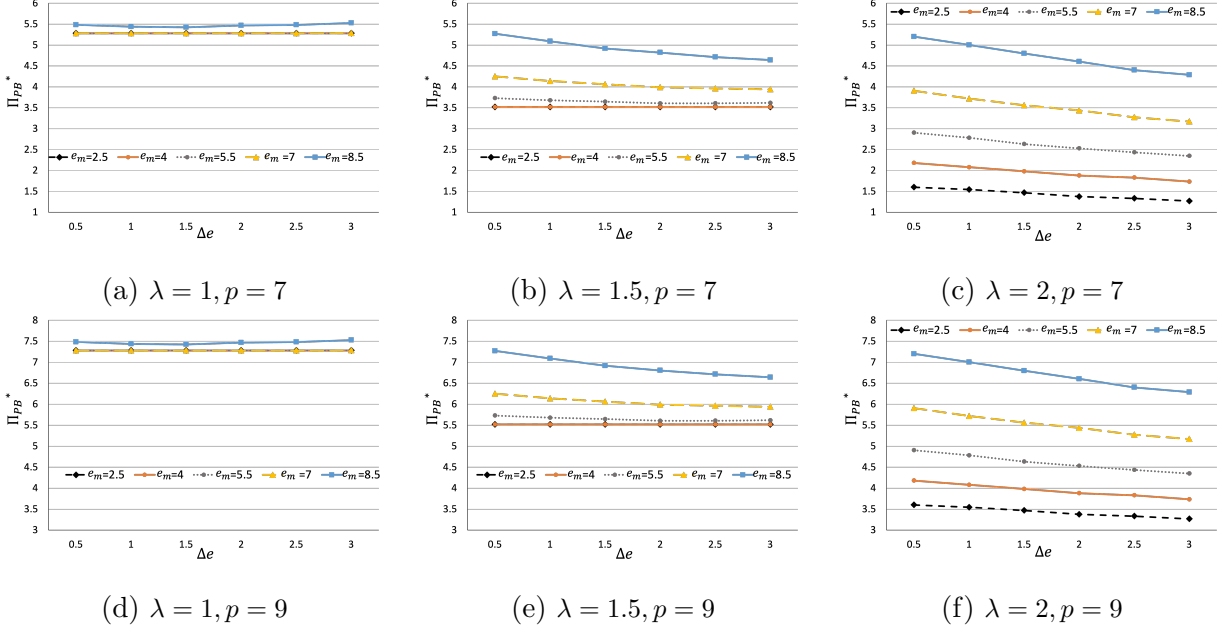

Figure 6: Impact of  $\Delta e$  and  $e_m$  on OEM Profit under Optimal Population-based Package (additional plots)

implies  $[\mu - 3\sigma, \mu + 3\sigma] \subset [\underline{e}, \bar{e}]$ . The rest of numerical design is the same as specified in §9.3 and Online Appendix B. As before, we plot the optimal OEM profit in the population-based strategy and the value of customization, as a function of the range  $\Delta e$  for each of the five levels of  $e_m$ . The plots are presented in Figures 8-9. The observations from these plots are consistent with what we have discussed in §9.3 and Online Appendix B.

## Analyses for §9.2 (Uniformly Distributed Expertise with $\bar{e} = e_f$ )

Without loss of generality, we solve for the optimal package when customer expertise is uniformly distributed on  $[\underline{e}, \bar{e}]$  with maximal expertise range, i.e.,  $\Delta e = \delta_{\max}(e_o)$  with  $\underline{e} = e_o, \bar{e} = e_f$ . All results for the more general case with  $\underline{e} > e_o$  can be obtained by replacing the  $e_o$  in the results for maximal expertise range with  $\underline{e}$ .

We will first solve for the optimal single-item package, and then the optimal two-item package, followed by a comparison of them which leads to the finding of the optimal package. To prepare for the analyses, we need to introduce a few definitions. Define

$$\delta_{\min}(e) := e - e_o, \quad (44)$$

which measures the gap between an expertise level  $e$  and that of a novice. Note that  $\delta_{\min}(e_f) =$

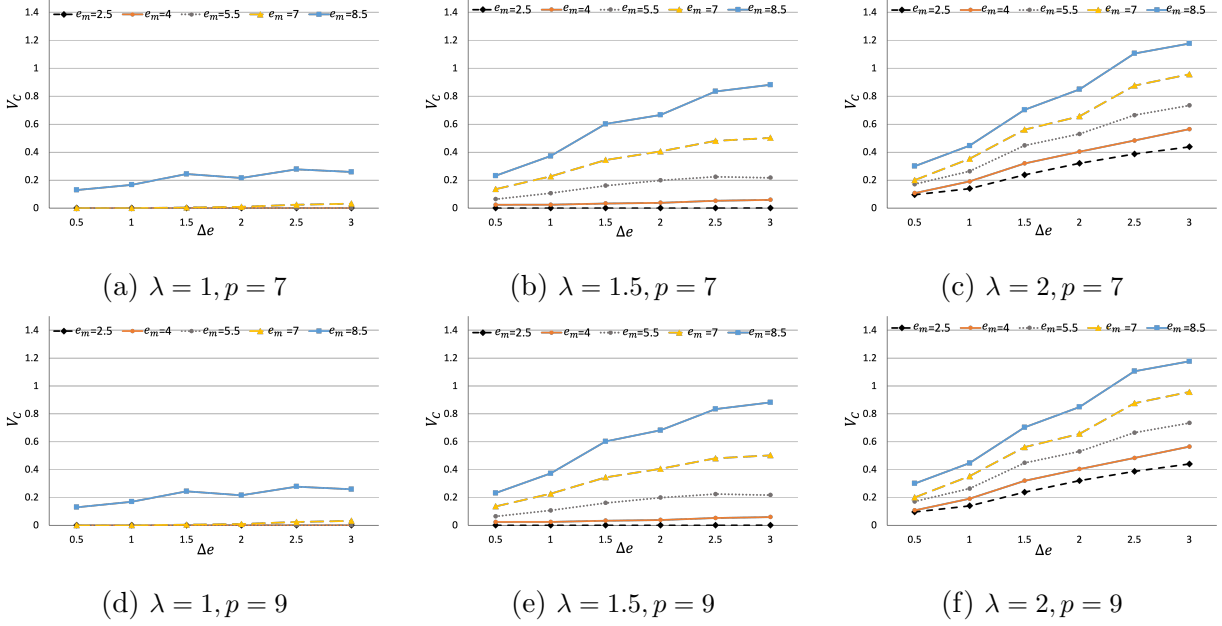

Figure 7: Impact of  $\Delta e$  and  $e_m$  on the Value of Customization (additional plots)

$\delta_{\max}(e_o)$ . Next, define three disjoint regions for the technical service level:

$$\mathcal{A}_I := \{\alpha \in [0, 1] \mid p - c(\alpha) \geq 2\Delta e \cdot (1 - \alpha)\}, \quad (45)$$

$$\mathcal{A}_{II} := \{\alpha \in [0, 1] \mid 0 \leq p - c(\alpha) < 2\Delta e \cdot (1 - \alpha)\}, \quad (46)$$

$$\mathcal{A}_{III} := \{\alpha \in [0, 1] \mid p - c(\alpha) < 0\}. \quad (47)$$

As we will show in the analyses below, the optimal technical service level (regardless of the package being single- or two-item) never arises in  $\mathcal{A}_{III}$ , while  $\mathcal{A}_I$  and  $\mathcal{A}_{II}$  both may include candidates for the optimal technical service level. Note also that  $0 \in \mathcal{A}_I \cup \mathcal{A}_{II}$  and  $1 \in \mathcal{A}_I \cup \mathcal{A}_{III}$ . In the following, we derive the explicit expressions for  $\mathcal{A}_I$ - $\mathcal{A}_{III}$ .

The solutions to the following equation will be critical for our analysis:

$$p - c(\alpha) = 2\Delta e \cdot (1 - \alpha), \quad (48)$$

whose property is presented in the following lemma.

**Lemma 4** *There are at most two solutions to (48), denoted as  $\hat{\alpha}_1$  and  $\hat{\alpha}_2$  with  $\hat{\alpha}_1 \leq \hat{\alpha}_2$ .*

We will use  $\hat{\alpha}_1 = \hat{\alpha}_2$  to represent the case when (48) has unique solution, and  $\hat{\alpha}_1 > \hat{\alpha}_2$  to represent the case when (48) has no solution. Note that, if  $\hat{\alpha}_1 \geq \hat{\alpha}_2$ , there are  $(\hat{\alpha}_1, \hat{\alpha}_2) = \emptyset$ ,  $[0, \hat{\alpha}_1] \cup [\hat{\alpha}_2, x] = [0, x]$  for any  $x \geq \hat{\alpha}_1$ .

**Lemma 5**  $\mathcal{A}_I$ ,  $\mathcal{A}_{II}$  and  $\mathcal{A}_{III}$  as defined in (45) - (47) can be derived as in Table 2, where  $c^{-1}(\cdot)$  is the inverse function of  $c(\cdot)$ , and  $\hat{\alpha}_1$  and  $\hat{\alpha}_2$  are as defined in Lemma 4.

Table 2: Expressions for  $\mathcal{A}_I$ ,  $\mathcal{A}_{II}$  and  $\mathcal{A}_{III}$

| Parameter Case                | $\mathcal{A}_I$                    | $\mathcal{A}_{II}$                                     | $\mathcal{A}_{III}$ |
|-------------------------------|------------------------------------|--------------------------------------------------------|---------------------|
| $p < \min\{2\Delta e, c(1)\}$ | $[\hat{\alpha}_1, \hat{\alpha}_2]$ | $[0, \hat{\alpha}_1) \cup (\hat{\alpha}_2, c^{-1}(p)]$ | $(c^{-1}(p), 1]$    |
| $2\Delta e \geq p > c(1)$     | $[\hat{\alpha}_1, 1]$              | $[0, \hat{\alpha}_1)$                                  | $\emptyset$         |
| $2\Delta e > p = c(1)$        | $[\hat{\alpha}_1, 1]$              | $[0, \hat{\alpha}_1)$                                  | $\emptyset$         |
| $2\Delta e < p \leq c(1)$     | $[0, \hat{\alpha}_1]$              | $(\hat{\alpha}_1, c^{-1}(p)]$                          | $(c^{-1}(p), 1]$    |
| $2\Delta e = p < c(1)$        | $[0, \hat{\alpha}_2]$              | $(\hat{\alpha}_2, c^{-1}(p)]$                          | $(c^{-1}(p), 1]$    |
| $2\Delta e = p = c(1)$        | $[0, 1]$                           | $\emptyset$                                            | $\emptyset$         |
| $p > \max\{2\Delta e, c(1)\}$ | $[0, 1]$                           | $\emptyset$                                            | $\emptyset$         |

### Uniformly Distributed Expertise: Single-item Package

We solve for the optimal single-item package. For any given single-item package  $(\alpha_S, r_S)$ , the resulting prosumer demand function is given below.

**Proposition 8** *Assume the customer expertise to be uniformly distributed on  $[e_o, e_f]$ . Under a single-item package  $(\alpha_S, r_S)$ , the segment of prosumers is*

$$d\mathcal{P}(\alpha_S, r_S) = \begin{cases} 0 & \text{if } r_S > p, \\ \frac{1}{\Delta e} \cdot \frac{p-r_S}{1-\alpha_S} & \text{if } p - \Delta e(1 - \alpha_S) < r_S \leq p, \alpha_S < 1, \\ 1 & \text{if } r_S \leq p - \Delta e(1 - \alpha_S), \alpha_S \leq 1. \end{cases} \quad (49)$$

Define

$$\Pi_S^I(\alpha) := p - c(\alpha) - \Delta e \cdot (1 - \alpha) \quad \text{and} \quad \Pi_S^{II}(\alpha) := \frac{1}{4\Delta e} \cdot \frac{(p - c(\alpha))^2}{1 - \alpha}. \quad (50)$$

It can be verified that  $\Pi_S^I(\alpha)$  is strictly concave, and there is  $\Pi_S^I(\alpha) \leq \Pi_S^{II}(\alpha)$  for any  $\alpha \in [0, 1)$ .

**Theorem 6** *Assume the customer expertise to be uniformly distributed on  $[e_o, e_f]$ . The optimal single-item package that solves (11) is given by*

$$(\alpha_S^*, r_S^*) = \begin{cases} (\alpha_S^I, r_S^I) & \text{if } \Pi_S^I(\alpha_S^I) \geq \Pi_S^{II}(\alpha_S^{II}), \\ (\alpha_S^{II}, r_S^{II}) & \text{otherwise,} \end{cases} \quad (51)$$

where the two candidates for the optimal single-item package are defined as follows:

$$(\alpha_S^I, r_S^I) := \left( \underset{\alpha \in \mathcal{A}_I}{\operatorname{argmax}} \Pi_S^I(\alpha), p - \Delta e(1 - \alpha_S^I) \right), \quad (52)$$

$$(\alpha_S^{II}, r_S^{II}) := \left( \underset{\alpha \in \mathcal{A}_{II}}{\operatorname{argmax}} \Pi_S^{II}(\alpha), \frac{p + c(\alpha_S^{II})}{2} \right). \quad (53)$$

Moreover, the OEM's resulting profit is  $\Pi(\alpha_S^*, r_S^*) = \max\{\Pi_S^I(\alpha_S^I), \Pi_S^{II}(\alpha_S^{II})\}$ . For a prosumer of

type  $e$ , the utility resulting from the two candidates above are:

$$U_{\mathcal{P}}(\alpha_S^I, r_S^I | e) = U_C + (1 - \alpha_S^I) \delta_{\min}(e), \quad (54)$$

$$U_{\mathcal{P}}(\alpha_S^{II}, r_S^{II} | e) = U_C - (1 - \alpha_S^{II}) \delta_{\max}(e) + \frac{p - c(\alpha_S^{II})}{2}. \quad (55)$$

By definition, it can be verified that there are  $\Pi_S^I(\alpha_S^I) \geq \Delta e \cdot (1 - \alpha_S^I)$  and  $\Pi_S^{II}(\alpha_S^{II}) < \Delta e \cdot (1 - \alpha_S^{II})$ .

**Corollary 3** *Assume the customer expertise to be uniformly distributed on  $[e_o, e_f]$ . Then  $\Pi(\alpha_S^*, r_S^*)$  increases in  $p$ .*

By Corollary 3, the OEM's profit from the optimal single-item package increases when the competition from print farm lessens.

### Uniformly Distributed Expertise: Two-item Package

We now consider the case when the OEM offers a two-item package, i.e.,  $(\alpha_M, \mathbf{r}_M) \in \mathcal{M}$ , where  $\mathcal{M}$  is as defined directly before equation (12) in the main paper. To characterize  $\mathcal{M}$ , we first derive the prosumer demand functions for any  $(\alpha_M, \mathbf{r}_M) \in \mathcal{M}$ , which are presented below.

**Proposition 9** *Assume the customer expertise to be uniformly distributed on  $[e_o, e_f]$ . Under a two-item package  $(\alpha_M, \mathbf{r}_M) \in \mathcal{M}$ , there are*

- if  $\frac{\Delta r}{\Delta \alpha} > \Delta e$ ,  $d_{\mathcal{P}_H}(\alpha_M, \mathbf{r}_M) = 0$ ,

$$d_{\mathcal{P}_L}(\alpha_M, \mathbf{r}_M) = \begin{cases} 0 & \text{if } r_L > p, \\ \frac{1}{\Delta e} \cdot \frac{p - r_L}{1 - \alpha_L} & \text{if } p - \Delta e \cdot (1 - \alpha_L) \leq r_L \leq p, \\ 1 & \text{if } r_L < p - \Delta e \cdot (1 - \alpha_L). \end{cases}$$

- If  $\frac{\Delta r}{\Delta \alpha} \leq \Delta e$ ,

$$d_{\mathcal{P}_H}(\alpha_M, \mathbf{r}_M) = \begin{cases} 0 & \text{if } \frac{(1 - \alpha_L) \Delta r}{\Delta \alpha} + r_L > p, \\ \frac{1}{\Delta e} \cdot \frac{p - r_L - \frac{\Delta r}{\Delta \alpha} (1 - \alpha_L)}{1 - \alpha_H} & \text{if } \alpha_H < 1, p - \Delta e \cdot (1 - \alpha_H) \leq r_H \leq p, \frac{(1 - \alpha_L) \Delta r}{\Delta \alpha} + r_L \leq p, \\ 1 - \frac{1}{\Delta e} \cdot \frac{\Delta r}{\Delta \alpha} & \text{if } r_H \leq p - \Delta e \cdot (1 - \alpha_H), \end{cases} \quad (56)$$

$$d_{\mathcal{P}_L}(\alpha_M, \mathbf{r}_M) = \begin{cases} 0 & \text{if } r_L > p, \\ \frac{1}{\Delta e} \cdot \frac{p - r_L}{1 - \alpha_L} & \text{if } r_L \leq p, \frac{(1 - \alpha_L) \Delta r}{\Delta \alpha} + r_L > p, \\ \frac{1}{\Delta e} \cdot \frac{\Delta r}{\Delta \alpha} & \text{if } \frac{(1 - \alpha_L) \Delta r}{\Delta \alpha} + r_L \leq p. \end{cases} \quad (57)$$

**Remark 2** By Proposition 9, for any two-item package with either  $\frac{\Delta r}{\Delta \alpha} > \Delta e$ , or  $\frac{\Delta r}{\Delta \alpha} \leq \Delta e$  and  $\frac{(1-\alpha_L)\Delta r}{\Delta \alpha} + r_L > p$ , there will be no prosumers who choose the premium plan, i.e., the only effective offering is the basic plan only. Hence,  $\mathcal{M}$  reduces to  $\mathcal{M}' = \left\{ (\boldsymbol{\alpha}, \mathbf{r}) \in \mathcal{M} \mid \frac{\Delta r}{\Delta \alpha} \leq \min\{\Delta e, \frac{p-r_L}{1-\alpha_L}\} \right\}$ .

Define

$$\Pi_M^I(\boldsymbol{\alpha}) := \begin{cases} \Pi_S^I(\alpha_H) + \frac{1}{4\Delta e} \cdot \frac{(\Delta c)^2}{\Delta \alpha} & \text{if } \frac{\Delta c}{\Delta \alpha} < 2\Delta e, \\ \Pi_S^I(\alpha_L) & \text{otherwise,} \end{cases} \quad (58)$$

$$\Pi_M^{II}(\boldsymbol{\alpha}) := \begin{cases} \Pi_S^{II}(\alpha_H) + \frac{1}{4\Delta e} \cdot \frac{(\Delta c)^2}{\Delta \alpha} & \text{if } \frac{p-c(\alpha_H)}{1-\alpha_H} > \frac{p-c(\alpha_L)}{1-\alpha_L}, \\ \Pi_S^{II}(\alpha_L) & \text{otherwise.} \end{cases} \quad (59)$$

Leveraging these definitions, the optimal two-item package is characterized below.

**Theorem 7** Assume the customer expertise to be uniformly distributed on  $[e_o, e_f]$ . The optimal two-item package that solves (12) is given by:

$$(\boldsymbol{\alpha}_M^*, \mathbf{r}_M^*) = \begin{cases} (\boldsymbol{\alpha}_M^I, \mathbf{r}_M^I) & \text{if } \Pi_M^I(\boldsymbol{\alpha}_M^I) \geq \Pi_M^{II}(\boldsymbol{\alpha}_M^{II}), \\ (\boldsymbol{\alpha}_M^{II}, \mathbf{r}_M^{II}) & \text{otherwise,} \end{cases} \quad (60)$$

where the two candidates for the optimal two-item package are defined as follows:

$$\boldsymbol{\alpha}_M^I := \underset{\alpha_L \in \mathcal{A}_I \cup \mathcal{A}_{II}, \alpha_H \in \mathcal{A}_I}{\operatorname{argmax}} \Pi_M^I(\boldsymbol{\alpha}), \quad (61)$$

$$\mathbf{r}_M^I := (p - \Delta e \cdot (1 - \alpha_L^I) + (\Delta e \Delta \alpha^I - \frac{\Delta c^I}{2})^+, p - \Delta e \cdot (1 - \alpha_H^I)); \quad (62)$$

$$\boldsymbol{\alpha}_M^{II} := \underset{\alpha_L, \alpha_H \in \mathcal{A}_{II}}{\operatorname{argmax}} \Pi_M^{II}(\boldsymbol{\alpha}), \quad (63)$$

$$\mathbf{r}_M^{II} := \left( \frac{p + c(\alpha_L^{II})}{2}, p - \frac{1 - \alpha_H^{II}}{2} \cdot \left[ \frac{p - c(\alpha_L^{II})}{1 - \alpha_L^{II}} + \left( \frac{p - c(\alpha_H^{II})}{1 - \alpha_H^{II}} - \frac{p - c(\alpha_L^{II})}{1 - \alpha_L^{II}} \right)^+ \right] \right), \quad (64)$$

where  $\Delta \alpha^{I(II)} := \alpha_H^{I(II)} - \alpha_L^{I(II)}$  and  $\Delta c^{I(II)} := c(\alpha_H^{I(II)}) - c(\alpha_L^{I(II)})$ . Moreover, the OEM's resulting profit is  $\Pi(\boldsymbol{\alpha}_M^*, \mathbf{r}_M^*) = \max \{ \Pi_M^I(\boldsymbol{\alpha}_M^I), \Pi_M^{II}(\boldsymbol{\alpha}_M^{II}) \}$ .

By Theorem 7, the two candidates for the optimal two-item package are closely related to the candidates for the optimal single-item package. In particular,  $\boldsymbol{\alpha}_M^{I(II)}$  is the maximizer of  $\Pi_M^{I(II)}(\boldsymbol{\alpha})$ , which by (58) and (59) equals to either  $\Pi_S^{I(II)}(\alpha_L)$  or  $\Pi_S^{I(II)}(\alpha_H)$  plus a nonnegative term  $(\frac{1}{4\Delta e} \cdot \frac{(\Delta c)^2}{\Delta \alpha})$ . Moreover,  $r_{H(L)}^{I(II)}$  depends on  $\alpha_{H(L)}^{I(II)}$  through the same function as  $r_S^{I(II)}$  depends on  $\alpha_S^{I(II)}$ .

## Uniformly Distributed Expertise: Optimal Population-based Strategy

Theorems 6 and 7 enable a comparison between the optimal single-item package and the optimal two-item package when customer expertise is uniformly distributed. In contrast to the two-point distributed case where single-item can be strictly optimal, we show for this case that the optimal

single-item package is generally dominated by the optimal two-item package. The optimality results and the condition for single-item to attain weak optimality are given in Theorem 5 and Proposition 7 in the main body of the paper.

When single-item indeed can be optimal, the prosumer's utility under the optimal population-based package can be found through (54) and (55). When single-item is suboptimal, the following corollary provides the evaluations for prosumer utility.

**Corollary 4** *Assume the customer expertise to be uniformly distributed on  $[e_o, e_f]$ . (i) If  $\Pi_M^I(\alpha_M^I) \geq \Pi_M^{II}(\alpha_M^{II})$  and  $\frac{\Delta c^I}{2\Delta\alpha^I} < 2\Delta e$ , then  $(\alpha^*, \mathbf{r}^*) = (\alpha_M^I, \mathbf{r}_M^I)$  with  $\mathbf{r}_M^I = (p - \Delta e \cdot (1 - \alpha_H^I) - \frac{\Delta c^I}{2}, p - \Delta e \cdot (1 - \alpha_H^I))$ . For a prosumer of type  $e$ ,*

$$U_{\mathcal{P}}(\alpha^*, \mathbf{r}^*|e) = \begin{cases} U_C + (1 - \alpha_H^I)\delta_{\min}(e) & \text{if } e < e_f - \frac{\Delta c^I}{2\Delta\alpha^I}, \\ U_C + (1 - \alpha_L^I)\delta_{\min}(e) - \Delta e\Delta\alpha^I + \frac{\Delta c^I}{2} & \text{otherwise.} \end{cases} \quad (65)$$

(ii) *If  $\Pi_M^I(\alpha_M^I) < \Pi_M^{II}(\alpha_M^{II})$  and  $\frac{p-c(\alpha_H^{II})}{1-\alpha_H^{II}} > \frac{p-c(\alpha_L^{II})}{1-\alpha_L^{II}}$ , then  $(\alpha^*, \mathbf{r}^*) = (\alpha_M^{II}, \mathbf{r}_M^{II})$  with  $\mathbf{r}_M^{II} = (\frac{p+c(\alpha_H^{II})}{2} - \frac{\Delta c^{II}}{2}, \frac{p+c(\alpha_H^{II})}{2})$ . For a prosumer of type  $e$ ,*

$$U_{\mathcal{P}}(\alpha^*, \mathbf{r}^*|e) = \begin{cases} U_C - (1 - \alpha_H^{II})\delta_{\max}(e) + \frac{p-c(\alpha_H^{II})}{2}. & \text{if } e < e_f - \frac{\Delta c^{II}}{2\Delta\alpha^{II}}, \\ U_C - (1 - \alpha_L^{II})\delta_{\max}(e) + \frac{p-c(\alpha_L^{II})}{2}. & \text{otherwise.} \end{cases} \quad (66)$$

When  $(\alpha_M^I, \mathbf{r}_M^I)$  is optimal, by (65), the utility of the prosumers who choose the premium plan, i.e., those with lower expertise, can be obtained by replacing  $\alpha_S^I$  with  $\alpha_H^I$  in (54); the utility of the prosumers who choose the basic plan, however, incurs an additional negative term  $(\frac{\Delta c^I}{2} - \Delta e\Delta\alpha^I)$  on top of replacing  $\alpha_S^I$  with  $\alpha_L^I$  in (54). When  $(\alpha_M^{II}, \mathbf{r}_M^{II})$  is optimal, by (66), the utility of the prosumers who choose the basic(premium) package, i.e., those with higher(lower) expertise, can be obtained by replacing  $\alpha_S^{II}$  with  $\alpha_L^{II}(\alpha_H^{II})$  in (55).

## Proofs for Online Appendix B and Supporting Results

**Proof. (Lemma 2)** By (8) we have

- for  $e < e_f - c'(0)$ ,  $\Phi(e) = p - \delta_{\max}(e) \cdot (1 - \phi(\delta_{\max}(e))) - c(\phi(\delta_{\max}(e)))$ .
  - if there is also  $e \geq e_f - c'(1)$ , we have  $\phi(\delta_{\max}(e)) = (c')^{-1}(\delta_{\max}(e))$ ,  $\Phi'(e) = 1 - \phi(\delta_{\max}(e)) \geq 0$  and  $\Phi''(e) = \phi'(\delta_{\max}(e)) > 0$ , where the signs are implied by the definition of  $\phi(\cdot)$ , and  $c(\cdot)$  being strictly increasing convex.
  - if there is also  $e < e_f - c'(1)$ , we have  $\phi(\delta_{\max}(e)) = 1$  and  $\Phi(e) = p - c(1)$ .
- for  $e \geq e_f - c'(0)$ ,  $\Phi(e) = p - \delta_{\max}(e)$  and is linearly increasing.

Summarizing the above lead to

$$\Phi(e) = \begin{cases} p - c(1) & \text{if } c'(1) < \delta_{\max}(e), \\ p - \delta_{\max}(e) \cdot (1 - \phi(\delta_{\max}(e))) - c(\phi(\delta_{\max}(e))) & \text{if } c'(0) < \delta_{\max}(e) \leq c'(1), \\ p - \delta_{\max}(e) & \text{if } \delta_{\max}(e) \leq c'(0). \end{cases} \quad (67)$$

The monotonicity of  $\phi(\cdot)$  and  $\varphi(\cdot)$  are implied by definition and that  $c(\cdot)$  being strictly increasing convex. Finally, (iii) is implied by (67) and  $\Phi(\cdot)$  being increasing. The proof is complete.  $\square$

**Proof. (Corollary 1)** For  $e \geq \delta_{\max}(c'(0))$ ,  $\alpha_S^*(e) \equiv 0$ ,  $r_S^*(e) \equiv p - \delta_{\max}(e)$ , and  $\varepsilon(\alpha_S^*(e), e) \equiv e$ . So  $\frac{\partial}{\partial e} r_S^*(e) = \frac{\partial}{\partial e} \varepsilon(\alpha_S^*(e), e) = 1$ . For  $e < \delta_{\max}(c'(0))$ ,  $\alpha_S^* = \phi(\delta_{\max}(e))$ ,  $r_S^* = p - \delta_{\max}(e) + \phi(\delta_{\max}(e))\delta_{\max}(e)$ ,  $\varepsilon(\alpha_S^*, e) = e + \phi(\delta_{\max}(e))\delta_{\max}(e)$ . And it can be verified in this case that  $\partial r_S^*(e)/\partial e = 1 - \phi(\delta_{\max}(e)) - \delta_{\max}(e)\phi'(\delta_{\max}(e)) = \partial \varepsilon(\alpha_S^*(e), e)/\partial e$ . Thus, it suffices to show that  $r_S^*$  can be non-monotone in  $\delta_{\max}(e)$ . To see this, let  $w := \delta_{\max}(e)$ , then as  $e$  increases from  $e_o$  to  $\delta_{\max}(c'(0))$ ,  $w$  decreases from  $\delta_{\max}(e_o)$  to  $c'(0)$ . By (9) there is  $r_S^*(e) = p - w \cdot (1 - \phi(w))$ , which implies  $\partial r_S^*/\partial w = -1 + \phi(w) + w\phi'(w)$ , where on the right hand side  $\phi(w) - 1 \leq 0$  and  $w\phi'(w) \geq 0$ . Specifically,  $\partial r_S^*/\partial w|_{w=c'(0)} = c'(0)\phi'(c'(0)) - 1$ , which can be negative if  $c'(0)$  is very close to zero. On the other hand, if  $\delta_{\max}(e_o) \geq c'(1)$ ,  $\partial r_S^*/\partial w$  can be positive as  $w$  approaches  $c'(1)$  from below. In other words, depending on the specific form of  $c(\cdot)$  and the value of  $\delta_{\max}(e_o)$ , the sign of  $\partial r_S^*/\partial w$  can change as  $w$  varies on  $[c'(0), \delta_{\max}(e_o)]$ . The proof is thus complete.  $\square$

**Proof. (Lemma 3)** (i) can be obtained via simple algebra.

(ii) Let  $\underline{k} := \kappa(e_f)$  and  $\psi := \kappa(e_o) - \underline{k}$ . Then we have,

$$\begin{aligned} \frac{\partial}{\partial k} \ell(\alpha, k) &= \left( (1 - \alpha) \cdot \frac{1}{k} + \alpha \cdot \frac{1}{\underline{k}} \right)^{-2} (1 - \alpha) \cdot \frac{1}{k^2} = \left( (1 - \alpha) + \alpha \cdot \frac{k}{\underline{k}} \right)^{-2} (1 - \alpha) \geq 0. \\ \frac{\partial}{\partial k} (k - \ell(\alpha, k)) &= 1 - \left( (1 - \alpha) + \alpha \cdot \frac{k}{\underline{k}} \right)^{-2} (1 - \alpha) \geq 0. \\ \frac{\partial^2}{\partial k^2} \ell(\alpha, k) &= 2 \left( (1 - \alpha) \cdot \frac{1}{k} + \alpha \cdot \frac{1}{\underline{k}} \right)^{-3} (1 - \alpha)^2 \cdot \frac{1}{k^4} - 2 \left( (1 - \alpha) \cdot \frac{1}{k} + \alpha \cdot \frac{1}{\underline{k}} \right)^{-2} (1 - \alpha) \cdot \frac{1}{k^3} \\ &= 2 \left( (1 - \alpha) \cdot \frac{1}{k} + \alpha \cdot \frac{1}{\underline{k}} \right)^{-3} (1 - \alpha) \cdot \frac{1}{k^3} \left( -\alpha \cdot \frac{1}{\underline{k}} \right) \leq 0. \\ \ell(\alpha, \underline{k}) &= \underline{k}. \\ \ell(\alpha, \underline{k} + \psi) &= \left( (1 - \alpha) \cdot \frac{1}{\underline{k} + \psi} + \alpha \cdot \frac{1}{\underline{k}} \right)^{-1} = \frac{(\underline{k} + \psi)\underline{k}}{\underline{k} + \psi\alpha} = \underline{k} + \psi \frac{1 - \alpha}{1 + \frac{\psi}{\underline{k}}\alpha}. \end{aligned}$$

(iii)

$$\begin{aligned}\frac{\partial}{\partial \alpha} \ell(\alpha, k) &= -k \left(1 + \alpha \left(\frac{k}{\underline{k}} - 1\right)\right)^{-2} \left(\frac{k}{\underline{k}} - 1\right) \leq 0. \\ \frac{\partial^2}{\partial \alpha^2} \ell(\alpha, k) &= 2k \left(1 + \alpha \left(\frac{k}{\underline{k}} - 1\right)\right)^{-3} \left(\frac{k}{\underline{k}} - 1\right)^2 \geq 0.\end{aligned}$$

And the proof is complete.  $\square$

**Proof. (Corollary 2)** The result is immediately implied by  $\Phi(\cdot)$  being increasing convex (Lemma 2 in Appendix B) and Proposition 1 (iv). The proof is thus complete.  $\square$

**Proof. (Theorem 5)** By (58)-(59) in Online Appendix B, it can be verified that

$$\begin{aligned}\Pi_M^I(\boldsymbol{\alpha}) &= f(\alpha_L) + \frac{[(2\Delta e \Delta \alpha - \Delta c)^+]^2}{4\Delta e \Delta \alpha}, \\ \Pi_M^{II}(\boldsymbol{\alpha}) &= g(\alpha_L) + \frac{(1 - \alpha_H)(1 - \alpha_L)}{4\Delta e \Delta \alpha} \cdot \left[ \left( \frac{p - c(\alpha_H)}{1 - \alpha_H} - \frac{p - c(\alpha_L)}{1 - \alpha_L} \right)^+ \right]^2.\end{aligned}\tag{68}$$

Combined with the definitions in (61) and (63), there are  $\Pi_M^I(\boldsymbol{\alpha}_M^I) = \max_{\alpha_L \in \mathcal{A}_I \cup \mathcal{A}_{II}, \alpha_H \in \mathcal{A}_I} \Pi_M^I(\boldsymbol{\alpha}) \geq \max_{\alpha_L \in \mathcal{A}_I} f(\alpha_L) = f(\alpha_S^I)$ ,  $\Pi_M^{II}(\boldsymbol{\alpha}_M^{II}) = \max_{\alpha_L, \alpha_H \in \mathcal{A}_{II}} \Pi_M^{II}(\boldsymbol{\alpha}) \geq \max_{\alpha_L \in \mathcal{A}_{II}} g(\alpha_L) = g(\alpha_S^{II})$ . Therefore, by Theorem 7, we must have  $\Pi(\boldsymbol{\alpha}_M^*, \mathbf{r}_M^*) \geq \max\{\Pi_M^I(\boldsymbol{\alpha}_M^I), \Pi_M^{II}(\boldsymbol{\alpha}_M^{II})\} \geq \max\{f(\alpha_S^I), g(\alpha_S^{II})\} = \Pi(\alpha_S^*, r_S^*)$ . So single-item attains optimality only if  $\Pi(\alpha_S^*, r_S^*) = \Pi(\boldsymbol{\alpha}_M^*, \mathbf{r}_M^*)$ .  $\square$

**Proof. (Proposition 7)** (i) When  $(\boldsymbol{\alpha}_M^*, \mathbf{r}_M^*) = (\boldsymbol{\alpha}_M^I, \mathbf{r}_M^I)$ , if  $\frac{\Delta c^I}{\Delta \alpha^I} \geq 2\Delta e$ , by (58), there must be  $\Pi_M^I(\boldsymbol{\alpha}_M^I) = f(\alpha_L^I)$ . Recall that  $f(\alpha) \leq g(\alpha)$  for any  $\alpha \in [0, 1)$ , so we must have  $\alpha_L^I \in \mathcal{A}_I$  (otherwise if  $\alpha_L^I \in \mathcal{A}_{II}$ ,  $\Pi_M^I(\boldsymbol{\alpha}_M^I) = f(\alpha_L^I) \leq g(\alpha_L^I) \leq \Pi_M^{II}(\boldsymbol{\alpha}_M^{II})$ , contradicting the optimality of  $(\boldsymbol{\alpha}_M^I, \mathbf{r}_M^I)$ ). Furthermore, by Theorem 6,  $f(\alpha_L^I) \leq \max\{f(\alpha_S^I), g(\alpha_S^{II})\} = \Pi(\alpha_S^*, r_S^*)$ . Therefore, the optimal single-item package is also the optimal package, i.e., the sufficient direction is proven. Next suppose  $\frac{\Delta c^I}{\Delta \alpha^I} < 2\Delta e$ , by (68) there is  $\Pi_M^I(\boldsymbol{\alpha}_M^I) = f(\alpha_L^I) + \frac{[2\Delta e \Delta \alpha^I - \Delta c^I]^2}{4\Delta e \Delta \alpha^I} > \max\{\max_{\alpha_L \in \mathcal{A}_I} f(\alpha_L), \max_{\alpha_L \in \mathcal{A}_{II}} g(\alpha_L)\} = \Pi(\alpha_S^*, r_S^*)$ , where the inequality is implied by (58), (59), and the optimality of  $(\boldsymbol{\alpha}_M^I, \mathbf{r}_M^I)$ . Hence the necessary direction is also shown. (ii) When  $(\boldsymbol{\alpha}_M^*, \mathbf{r}_M^*) = (\boldsymbol{\alpha}_M^{II}, \mathbf{r}_M^{II})$ , the sufficient and necessary condition can be shown following the same structure as above, and we omit them for brevity. Thus the proof is complete.  $\square$

**Proof. (Lemma 4)** Define

$$v(\alpha) := p - c(\alpha) - 2\Delta e \cdot (1 - \alpha).\tag{69}$$

Then there are  $v' = -c' + 2\Delta e$ ,  $v'' = -c''$ . Recall that  $c' > 0$  and  $c'' > 0$ , therefore  $v'' < 0$ , i.e.,  $v$  is

strictly concave. As a result,  $v(\alpha) = 0$  can have no more than two solutions.  $\square$

**Proof. (Lemma 5)** First of all, any  $\alpha \in \mathcal{A}_I \cup \mathcal{A}_{II}$  must imply  $\alpha \leq c^{-1}(p)$ , where  $c^{-1}(\cdot)$  is the inverse function of  $c(\cdot)$ . Because otherwise, there is  $c(\alpha) > p$ , i.e.,  $\alpha \in \mathcal{A}_{III}$ . Secondly,  $c^{-1}(p) \leq 1$  if and only if  $p \leq c(1)$ . Thirdly, by (69), note that  $v(0) = p - 2\Delta e$ ,  $v(1) = p - c(1)$ .

- If  $c'(1) < 2\Delta e$ ,

there is  $v' > 0$  for  $\alpha \in [0, 1]$ , i.e.,  $v$  strictly increases in  $\alpha$  on  $[0, 1]$ , which implies  $v(1) > v(0)$ , i.e.,  $c(1) < 2\Delta e$ .

- $p < c(1)$ , i.e.  $v(1) < 0$ ,

there are  $v(\cdot) < 0$  on  $[0, 1]$ , i.e.,  $\mathcal{A}_I = \emptyset$ ,  $\mathcal{A}_{II} = [0, c^{-1}(p)]$ .

- $c(1) < p \leq 2\Delta e$

there are  $v(0) \leq 0, v(1) > 0$ . And there is  $\hat{\alpha}_1 = \hat{\alpha}_2$ , and  $\mathcal{A}_I = [\hat{\alpha}_1, 1]$  and  $\mathcal{A}_{II} = [0, \hat{\alpha}_1)$ .

- $c(1) = p < 2\Delta e$ , there are  $v(0) < 0, v(1) = 0$ . And there is  $\hat{\alpha}_1 = \hat{\alpha}_2 = 1$ , and  $\mathcal{A}_I = \{1\}$  and  $\mathcal{A}_{II} = [0, 1)$ .

- $p > 2\Delta e$ ,

there are  $v(0) > 0$  and thus  $v(\cdot) > 0$  on  $[0, 1]$ , i.e.,  $\mathcal{A}_I = [0, 1]$ ,  $\mathcal{A}_{II} = \emptyset$ .

- If  $c'(0) \leq 2\Delta e$  and  $c'(1) \geq 2\Delta e$ ,

there are  $v'(0) \geq 0$  and  $v'(1) \leq 0$ , i.e.,  $v$  first increases and then decreases on  $[0, 1]$ .

- $2\Delta e < p \leq c(1)$

then  $v(0) > 0, v(1) \leq 0$ . As a result, there is  $\hat{\alpha}_1 = \hat{\alpha}_2$ , and  $\mathcal{A}_I = [0, \hat{\alpha}_1]$  and  $\mathcal{A}_{II} = (\hat{\alpha}_1, c^{-1}(p)]$ .

- $2\Delta e = p < c(1)$

then  $v(0) = 0, v(1) < 0$ . As a result, there is  $\hat{\alpha}_1 = 0$ ,  $\mathcal{A}_I = [0, \hat{\alpha}_2]$  and  $\mathcal{A}_{II} = (\hat{\alpha}_2, c^{-1}(p)]$

- $2\Delta e = p = c(1)$

then  $v(0) = 0, v(1) = 0$ ,  $\hat{\alpha}_1 = 0, \hat{\alpha}_2 = 1$ .  $\mathcal{A}_I = [0, 1]$  and  $\mathcal{A}_{II} = \emptyset$ .

- $p < \min\{2\Delta e, c(1)\}$ ,

then  $v(0) < 0, v(1) < 0$ ,  $\mathcal{A}_I = [\hat{\alpha}_1, \hat{\alpha}_2]$ ,  $\mathcal{A}_{II} = [0, \hat{\alpha}_1) \cup (\hat{\alpha}_2, c^{-1}(p)]$ ;

- $c(1) < p \leq 2\Delta e$ ,

then  $v(0) \leq 0, v(1) > 0$ , and there is  $\hat{\alpha}_1 = \hat{\alpha}_2$ . As a result,  $\mathcal{A}_I = [\hat{\alpha}_1, 1]$  and  $\mathcal{A}_{II} = [0, \hat{\alpha}_1)$ .

–  $c(1) = p < 2\Delta e$ ,

then  $v(0) < 0, v(1) = 0$ , and there is  $\hat{\alpha}_2 = 1$ .  $\mathcal{A}_I = [\hat{\alpha}_1, 1]$  and  $\mathcal{A}_{II} = [0, \hat{\alpha}_1]$ .

–  $p > \max\{2\Delta e, c(1)\}$ ,

then  $v(0) > 0, v(1) > 0$ . Thus,  $\mathcal{A}_I = [0, 1], \mathcal{A}_{II} = \emptyset$ .

- If  $c'(0) > 2\Delta e$ ,

there is  $v'(\cdot) < 0$  on  $[0, 1]$ , i.e.,  $v$  strictly decreases in  $\alpha$  on  $[0, 1]$ , which implies  $v(1) < v(0)$ , i.e.,  $c(1) > 2\Delta e$ .

–  $2\Delta e < p \leq c(1)$ ,

then  $v(0) > 0, v(1) \leq 0$ . As a result, there is  $\hat{\alpha}_1 = \hat{\alpha}_2$ , and  $\mathcal{A}_I = [0, \hat{\alpha}_1]$  and  $\mathcal{A}_{II} = (\hat{\alpha}_1, c^{-1}(p)]$ .

–  $2\Delta e = p < c(1)$ ,

then  $v(0) = 0, v(1) < 0$ . As a result, there is  $\hat{\alpha}_1 = \hat{\alpha}_2 = 0$ , and  $\mathcal{A}_I = \{0\}$  and  $\mathcal{A}_{II} = (0, c^{-1}(p)]$ .

–  $p < \min\{2\Delta e, c(1)\}$ ,

then  $v(0) < 0, v(1) < 0$ . Thus,  $\mathcal{A}_I = \emptyset, \mathcal{A}_{II} = [0, c^{-1}(p)]$ .

–  $p > \max\{2\Delta e, c(1)\}$ ,

then  $v(0) > 0, v(1) > 0$ . Thus,  $\mathcal{A}_I = [0, 1], \mathcal{A}_{II} = \emptyset$ .

By consolidating the above cases and noting that  $\mathcal{A}_I \cup \mathcal{A}_{II} \cup \mathcal{A}_{III} = [0, 1]$ , we can obtain the results as in Table 2. □

**Proof. (Proposition 8)** Note that in this case,  $U_{\mathcal{P}}(e) \geq U_{\mathcal{C}}$  if and only if  $\varepsilon(\alpha_S, e) - e_f \geq r_S - p$ , which is equivalent to

$$(1 - \alpha_S)\delta_{\max}(e) \leq p - r_S. \quad (70)$$

- For  $\alpha_S = 1$ , (70) is equivalent to  $r_S \leq p$ .

- For  $\alpha_S < 1$ , (70) is equivalent to  $e \geq e_f - \frac{p-r_S}{1-\alpha_S}$ .

– For  $r_S \leq p - \Delta e(1 - \alpha_S)$ , there is  $e_f - \frac{p-r_S}{1-\alpha_S} \leq e_o$ . Hence (70) always hold, i.e.  $d_{\mathcal{P}} = 1$ .

– For  $p - \Delta e(1 - \alpha_S) < r_S \leq p$ ,  $d_{\mathcal{P}} = \frac{1}{\Delta e} \cdot \frac{p-r_S}{1-\alpha_S}$ .

– For  $r_S > p$ , then  $e_f - \frac{p-r_S}{1-\alpha_S} > e_f$ , and thus (70) does not hold, i.e.  $d_{\mathcal{P}} = 0$ .

□

**Proof. (Theorem 6)** For simplicity, define  $f(\cdot) := \Pi_S^I(\cdot)$  and  $g(\cdot) := \Pi_S^{II}(\cdot)$ . By (11) and (49), the OEM's profit function under any given single-item package  $(\alpha_S, r_S)$  can be obtained as

$$\Pi(\alpha_S, r_S) = \begin{cases} 0 & \text{if } r_S > p, \\ \frac{1}{\Delta e} \cdot \frac{(r_S - c(\alpha_S))(p - r_S)}{1 - \alpha_S} & \text{if } p - \Delta e(1 - \alpha_S) < r_S \leq p, \alpha_S < 1, \\ r_S - c(\alpha_S) & \text{if } r_S \leq p - \Delta e(1 - \alpha_S), \alpha_S \leq 1. \end{cases}$$

- For any given  $\alpha_S$  that satisfies  $p - c(\alpha_S) \geq 2\Delta e(1 - \alpha_S)$ , i.e.,

$$h(\alpha_S) := p - c(\alpha_S) - 2\Delta e(1 - \alpha_S) \geq 0, \quad (71)$$

there is  $p - \Delta e(1 - \alpha_S) \geq \frac{p + c(\alpha_S)}{2}$ , and hence  $\Pi(\alpha_S, r_S)$  is decreasing in  $r_S$  on  $[p - \Delta e(1 - \alpha_S), p]$ . Therefore, on  $[p - \Delta e(1 - \alpha_S), p]$ ,  $\Pi(\alpha_S, r_S)$  is maximized at  $r_S = p - \Delta e(1 - \alpha_S)$  with

$$\Pi(\alpha_S, r_S)|_{r_S = p - \Delta e(1 - \alpha_S)} = f(\alpha_S).$$

On the other hand, on  $[0, p - \Delta e(1 - \alpha_S)]$ ,  $\Pi(\alpha_S, r_S)$  is increasing in  $r_S$  and thus is also maximized at  $r_S = p - \Delta e(1 - \alpha_S)$ . Note that  $f(\alpha_S) = h(\alpha_S) + \Delta e(1 - \alpha_S) \geq \Delta e(1 - \alpha_S) \geq 0$ , where the first inequality is due to (71). To summarize, for any given  $\alpha_S$  that satisfies (71),  $\max_{r_S \geq 0} \Pi(\alpha_S, r_S) = f(\alpha_S)$  with  $\operatorname{argmax}_{r_S \geq 0} \Pi(\alpha_S, r_S) = p - \Delta e(1 - \alpha_S)$ .

- For any given  $\alpha_S$  that satisfies  $0 \leq p - c(\alpha_S) \leq 2\Delta e(1 - \alpha_S)$ , i.e.,

$$h(\alpha_S) \leq 0 \text{ and } p - c(\alpha_S) \geq 0, \quad (72)$$

there is  $p - \Delta e(1 - \alpha_S) \leq \frac{p + c(\alpha_S)}{2} \leq p$ . Therefore, on  $[p - \Delta e(1 - \alpha_S), p]$ ,  $\Pi(\alpha_S, r_S)$  is maximized at  $r_S = \frac{p + c(\alpha_S)}{2}$  with

$$\Pi(\alpha_S, r_S)|_{r_S = \frac{p + c(\alpha_S)}{2}} = g(\alpha_S).$$

By definition, there must be

$$g(\alpha_S) \geq \max \{ \Pi(\alpha_S, r_S)|_{r_S = p - \Delta e(1 - \alpha_S)}, \Pi(\alpha_S, r_S)|_{r_S = p} \} = \max \{ f(\alpha_S), 0 \}.$$

On the other hand, on  $[0, p - \Delta e(1 - \alpha_S)]$ ,  $\Pi(\alpha_S, r_S)$  is increasing in  $r_S$  and thus is maximized at  $r_S = p - \Delta e(1 - \alpha_S)$  with  $\Pi(\alpha_S, r_S)|_{r_S = p - \Delta e(1 - \alpha_S)} = f(\alpha_S)$ . In addition, for  $r_S \in (p, +\infty)$ ,  $\Pi(\alpha_S, r_S) \equiv 0$ . To summarize, for any given  $\alpha_S$  that satisfies (72),  $\max_{r_S \geq 0} \Pi(\alpha_S, r_S) = g(\alpha_S)$  with  $\operatorname{argmax}_{r_S \geq 0} \Pi(\alpha_S, r_S) = \frac{p + c(\alpha_S)}{2}$ .

- For any given  $\alpha_S$  that satisfies  $p - c(\alpha_S) < 0$ , there is  $\frac{p + c(\alpha_S)}{2} > p$ . Therefore, on  $[p - \Delta e(1 - \alpha_S), p]$ ,  $\Pi(\alpha_S, r_S)$  is maximized at  $r_S = p$  with  $\Pi(\alpha_S, r_S)|_{r_S = p} = 0$ . For  $r_S \in (p, +\infty)$ ,  $\Pi(\alpha_S, r_S) \equiv 0$ . On the other hand, on  $[0, p - \Delta e(1 - \alpha_S)]$ ,  $\Pi(\alpha_S, r_S)$  is increasing in  $r_S$  and thus is maximized at  $r_S = p - \Delta e(1 - \alpha_S)$  with  $\Pi(\alpha_S, r_S)|_{r_S = p - \Delta e(1 - \alpha_S)} = f(\alpha_S) < 0$ ,

where the inequality is due to  $p - c(\alpha_S) < 0$ . Therefore, for any  $\alpha_S$  such that  $p - c(\alpha_S) < 0$ ,  $\max_{r_S \geq 0} \Pi(\alpha_S, r_S) = 0$  with  $\operatorname{argmax}_{r_S \geq 0} \Pi(\alpha_S, r_S) = p$ .

By summarizing the above scenarios, we have

$$\max_{r_S \geq 0} \Pi(\alpha_S, r_S) = \begin{cases} f(\alpha_S) & \text{for } \alpha_S \in \mathcal{A}_I, \\ g(\alpha_S) & \text{for } \alpha_S \in \mathcal{A}_{II}, \\ 0 & \text{for } \alpha_S \in \mathcal{A}_{III}. \end{cases}$$

Since we have established in the analyses above that  $f(\alpha_S) \geq 0$  for  $\alpha_S \in \mathcal{A}_I$  and  $g(\alpha_S) \geq 0$  for  $\alpha_S \in \mathcal{A}_{II}$ , any  $\alpha_S$  such that  $\alpha_S \in \mathcal{A}_{III}$  must be suboptimal (note that  $\mathcal{A}_I \cup \mathcal{A}_{II} \neq \emptyset$  with  $0 \in \mathcal{A}_I \cup \mathcal{A}_{II}$ ). The optimal package and resulting profit can be obtained as in Theorem [6](#).  $\square$

**Proof. (Corollary [3](#))** Consider arbitrary  $p_1, p_2$  such that  $0 \leq p_1, p_2 \leq e_f$  with  $p_1 \leq p_2$ . Let  $f(\cdot|p_i)$ ,  $\alpha_S^I(p_i)$ ,  $\alpha_S^{II}(p_i)$  denote the relevant notations under the corresponding  $p_i$ . Then there are,  $f(\alpha_S^I(p_1)|p_1) \leq f(\alpha_S^I(p_1)|p_2) \leq f(\alpha_S^I(p_2)|p_2)$ , where the first inequality is by simply algebra, and the second is by the definition of  $\alpha_S^I(p_2)$ . Similarly, we also have  $g(\alpha_S^{II}(p_1)|p_1) \leq g(\alpha_S^{II}(p_1)|p_2) \leq g(\alpha_S^{II}(p_2)|p_2)$  - this can be seen by examining all the cases in Table [2](#): in the first three cases, for  $\alpha_S \in \mathcal{A}_{II}$ , we have  $p - c(\alpha_S) \geq 0$  and thus  $g(\alpha_S|p)$  increases in  $p$ ; in the last case,  $\mathcal{A}_{II} = \emptyset$ , i.e.,  $\alpha_S^{II}$  becomes irrelevant. Therefore we must have  $\max\{f(\alpha_S^I(p_1)|p_1), g(\alpha_S^{II}(p_1)|p_1)\} \leq \max\{f(\alpha_S^I(p_2)|p_2), g(\alpha_S^{II}(p_2)|p_2)\}$ , which implies that  $\Pi(\alpha_S^*, r_S^*)$  increases in  $p$ .  $\square$

**Proof. (Proposition [9](#))** For any two-item package  $(\alpha_M, \mathbf{r}_M) \in \mathcal{M}'$ , there are  $0 < \Delta\alpha \leq 1, \Delta r > 0$ . In this case, the utility of a prosumer of type  $e$  is given by [\(1\)](#).

- If  $\frac{\Delta r}{\Delta\alpha} > \Delta e$ ,

then  $e_f - \frac{\Delta r}{\Delta\alpha} < e_o$ , then no prosumers choose premium plan, i.e.,  $d_{\mathcal{P}_H}(\alpha_M, \mathbf{r}_M) = 0$ . Also, note that  $U_{\mathcal{P}}(e) \geq U_C$  if and only if  $e \geq e_f - \frac{p-r_L}{1-\alpha_L}$ . Therefore, if there is further

-  $r_L > p$ , then  $e_f - \frac{p-r_L}{1-\alpha_L} > e_f$ , i.e.,  $U_{\mathcal{P}}(e) < U_C$  for all  $e \in [e_o, e_f]$ , and thus  $d_{\mathcal{P}_L}(\alpha_M, \mathbf{r}_M) = 0$ .

-  $p - \Delta e \cdot (1 - \alpha_L) \leq r_L \leq p$ , then  $e_o \leq e_f - \frac{p-r_L}{1-\alpha_L} \leq e_f$ , and thus  $d_{\mathcal{P}_L}(\alpha_M, \mathbf{r}_M) = \frac{1}{\Delta e} \cdot \frac{p-r_L}{1-\alpha_L}$ .

-  $r_L < p - \Delta e \cdot (1 - \alpha_L)$ , then  $e_f - \frac{p-r_L}{1-\alpha_L} < e_o$ , and thus  $d_{\mathcal{P}_L}(\alpha_M, \mathbf{r}_M) = 1$ .

- If  $\frac{\Delta r}{\Delta\alpha} \leq \Delta e$ ,

then  $e_f - \frac{\Delta r}{\Delta\alpha} \geq e_o$ , then a prosumer of type  $e$  will choose premium plan if and only if  $e < e_f - \frac{\Delta r}{\Delta\alpha}$ .

- For  $e < e_f - \frac{\Delta r}{\Delta \alpha}$ , i.e., for customers who will choose premium plan conditioning that they decide to be prosumers,  $U_{\mathcal{P}}(e) \geq U_{\mathcal{C}}$  is equivalent to

$$(1 - \alpha_H)\delta_{\max}(e) \leq p - r_H. \quad (73)$$

- \* For  $\alpha_H = 1$ , (73) is equivalent to  $r_H \leq p$ . Therefore,

$$\text{if } r_H \leq p, d_{\mathcal{P}_H}(\boldsymbol{\alpha}_M, \mathbf{r}_M) = \frac{1}{\Delta e} \cdot (\Delta e - \frac{\Delta r}{\Delta \alpha}) = 1 - \frac{1}{\Delta e} \cdot \frac{\Delta r}{\Delta \alpha};$$

$$\text{if } r_H > p, d_{\mathcal{P}_H}(\boldsymbol{\alpha}_M, \mathbf{r}_M) = 0.$$

- \* For  $\alpha_H < 1$ , (73) is equivalent to  $e \geq e_f - \frac{p - r_H}{1 - \alpha_H}$ .

- For  $r_H \leq p - \Delta e \cdot (1 - \alpha_H)$ , there is  $e_f - \frac{p - r_H}{1 - \alpha_H} \leq e_o$ . (Combined with  $e_f - \frac{\Delta r}{\Delta \alpha} \geq e_o$ , we have  $e_f - \frac{\Delta r}{\Delta \alpha} \geq e_f - \frac{p - r_H}{1 - \alpha_H}$ , which is equivalent to  $\frac{(1 - \alpha_H)\Delta r}{\Delta \alpha} + r_H = \frac{(1 - \alpha_L)\Delta r}{\Delta \alpha} + r_L \leq p$ .)

$$\text{Hence (73) always hold with } d_{\mathcal{P}_H}(\boldsymbol{\alpha}_M, \mathbf{r}_M) = 1 - \frac{1}{\Delta e} \cdot \frac{\Delta r}{\Delta \alpha};$$

- For  $p - \Delta e \cdot (1 - \alpha_H) \leq r_H \leq p$ , there is  $e_o \leq e_f - \frac{p - r_H}{1 - \alpha_H} \leq e_f$ .

$$\text{If there is further } \frac{(1 - \alpha_L)\Delta r}{\Delta \alpha} + r_L \leq p \text{ (which is equivalent to } e_f - \frac{\Delta r}{\Delta \alpha} \geq e_f - \frac{p - r_H}{1 - \alpha_H}),$$

customers of type  $e$  will choose to be a prosumer and also prefer premium plan

over the basic plan if and only if  $e \in [e_f - \frac{p - r_H}{1 - \alpha_H}, e_f - \frac{\Delta r}{\Delta \alpha}]$ , with  $d_{\mathcal{P}_H}(\boldsymbol{\alpha}_M, \mathbf{r}_M) =$

$$\frac{1}{\Delta e} \cdot \left( \frac{p - r_H}{1 - \alpha_H} - \frac{\Delta r}{\Delta \alpha} \right) = \frac{1}{\Delta e} \cdot \frac{p - r_L - \frac{\Delta r}{\Delta \alpha}(1 - \alpha_L)}{1 - \alpha_H};$$

$$\text{if instead } \frac{(1 - \alpha_L)\Delta r}{\Delta \alpha} + r_L > p \text{ (i.e., } e_f - \frac{\Delta r}{\Delta \alpha} < e_f - \frac{p - r_H}{1 - \alpha_H}), \text{ then } d_{\mathcal{P}_H}(\boldsymbol{\alpha}_M, \mathbf{r}_M) = 0.$$

- For  $r_H > p$ , there is  $e_f - \frac{p - r_H}{1 - \alpha_H} > e_f$ , then  $d_{\mathcal{P}_H}(\boldsymbol{\alpha}_M, \mathbf{r}_M) = 0$ .

- For  $e \geq e_f - \frac{\Delta r}{\Delta \alpha}$ , i.e., for customers who will not choose premium plan if they decide to be prosumers,  $U_{\mathcal{P}}(e) \geq U_{\mathcal{C}}$  is equivalent to

$$e \geq e_f - \frac{p - r_L}{1 - \alpha_L}. \quad (74)$$

- \* For  $r_L \leq p - \Delta e \cdot (1 - \alpha_L)$ , there is  $e_f - \frac{p - r_L}{1 - \alpha_L} \leq e_o$ . (Combined with  $e_f - \frac{\Delta r}{\Delta \alpha} \geq e_o$ ,

$$\text{we have } e_f - \frac{\Delta r}{\Delta \alpha} \geq e_f - \frac{p - r_L}{1 - \alpha_L}, \text{ which is equivalent to } \frac{(1 - \alpha_L)\Delta r}{\Delta \alpha} + r_L \leq p.)$$

$$\text{Hence (74) always hold with } d_{\mathcal{P}_L}(\boldsymbol{\alpha}_M, \mathbf{r}_M) = \frac{1}{\Delta e} \cdot \frac{\Delta r}{\Delta \alpha};$$

- \* For  $p - \Delta e \cdot (1 - \alpha_L) \leq r_L \leq p$ , there is  $e_o \leq e_f - \frac{p - r_L}{1 - \alpha_L} \leq e_f$ .

$$\text{If there is further } \frac{(1 - \alpha_L)\Delta r}{\Delta \alpha} + r_L \leq p \text{ (which is equivalent to } e_f - \frac{\Delta r}{\Delta \alpha} \geq e_f - \frac{p - r_L}{1 - \alpha_L}),$$

customers of type  $e > e_f - \frac{\Delta r}{\Delta \alpha}$  will all choose to be a prosumer and prefer the basic

plan, i.e.,  $d_{\mathcal{P}_L}(\boldsymbol{\alpha}_M, \mathbf{r}_M) = \frac{1}{\Delta e} \cdot \frac{\Delta r}{\Delta \alpha}$ .

if instead  $\frac{(1 - \alpha_L)\Delta r}{\Delta \alpha} + r_L > p$  (i.e.,  $e_f - \frac{\Delta r}{\Delta \alpha} < e_f - \frac{p - r_L}{1 - \alpha_L}$ ), then customers of type

$e \geq e_f - \frac{p - r_L}{1 - \alpha_L}$  will choose to be prosumers with basic plan only, i.e.,  $d_{\mathcal{P}_L}(\boldsymbol{\alpha}_M, \mathbf{r}_M) =$

$$\frac{1}{\Delta e} \cdot \frac{p - r_L}{1 - \alpha_L}. \text{ (Note that } \frac{(1 - \alpha_L)\Delta r}{\Delta \alpha} + r_L > p \text{ implies } r_L > p - \frac{(1 - \alpha_L)\Delta r}{\Delta \alpha} \geq p - (1 - \alpha_L)\Delta e \geq$$

$$p - e_f.)$$

\* For  $r_L > p$ , there is  $e_f - \frac{p-r_L}{1-\alpha_L} > e_f$ , then  $d_{\mathcal{P}_L}(\boldsymbol{\alpha}_M, \mathbf{r}_M) = 0$ .

By summarizing the above cases, we can obtain the customers' choice as in Proposition 9.  $\square$

**Proof. (Theorem 7)** Firstly, note that via simple algebra we have

$$\mathcal{M}' = \left\{ (\boldsymbol{\alpha}, \mathbf{r}) \in \mathcal{M} \mid \Delta r \leq \Delta e \cdot \Delta \alpha, r_H \leq p - \frac{1-\alpha_H}{\Delta \alpha} \Delta r \right\}.$$

Note that for any  $(\boldsymbol{\alpha}, \mathbf{r}) \in \mathcal{M}'$ , there are  $\frac{1-\alpha_H}{\Delta \alpha} \Delta r \leq \frac{1-\alpha_H}{\Delta \alpha} \cdot \Delta e \cdot \Delta \alpha = \Delta e(1-\alpha_H)$ , and this implies  $p - \Delta e \cdot (1-\alpha_H) \leq p - \frac{1-\alpha_H}{\Delta \alpha} \Delta r$ . Combined with (12) and Proposition 9, the OEM's profit function on the region  $\mathcal{M}'$  can be obtained as: for any  $(\boldsymbol{\alpha}_M, \mathbf{r}_M) \in \mathcal{M}'$ ,

$$\begin{aligned} \Pi(\boldsymbol{\alpha}_M, \mathbf{r}_M) = & \\ & \begin{cases} \frac{1}{\Delta e} \cdot \left( \frac{(r_H - c(\alpha_H)) \cdot (p - r_L - \frac{\Delta r}{\Delta \alpha} (1 - \alpha_L))}{1 - \alpha_H} + \frac{(r_L - c(\alpha_L)) \Delta r}{\Delta \alpha} \right) & \text{if } \alpha_H < 1, p - \Delta e \cdot (1 - \alpha_H) \leq r_H \leq p - \frac{1 - \alpha_H}{\Delta \alpha} \Delta r, \\ (r_H - c(\alpha_H)) \cdot \left( 1 - \frac{1}{\Delta e} \cdot \frac{\Delta r}{\Delta \alpha} \right) + \frac{1}{\Delta e} \cdot \frac{(r_L - c(\alpha_L)) \Delta r}{\Delta \alpha} & \text{if } r_H \leq p - \Delta e \cdot (1 - \alpha_H). \end{cases} \end{aligned}$$

We will solve the optimization by first fixing the value of  $\alpha_L$ . Note that it is never optimal to consider  $\alpha_L \in \mathcal{A}_{III}$ , since that will result in negative profit for the OEM. Therefore it suffices to consider  $\alpha_L \in \mathcal{A}_I \cup \mathcal{A}_{II}$ . Hence we will first suppose that such a  $0 \leq \alpha_L < 1$  is given, and later optimize over  $\alpha_L$ . We will separate the analyses into two parts based on whether  $\alpha_H$  is less than or equal to one.

- For  $\alpha_H = 1$ ,

$(\boldsymbol{\alpha}_M, \mathbf{r}_M) \in \mathcal{M}'$  implies  $\Delta r \leq \Delta e \cdot (1 - \alpha_L)$  and  $r_H \leq p$ , and  $\Pi(\boldsymbol{\alpha}_M, \mathbf{r}_M) |_{\alpha_H=1} = (r_H - c(1)) \cdot \left( 1 - \frac{1}{\Delta e} \cdot \frac{\Delta r}{1 - \alpha_L} \right) + \frac{1}{\Delta e} \cdot \frac{(r_H - \Delta r - c(\alpha_L)) \Delta r}{1 - \alpha_L}$ . Recall that  $1 \in \mathcal{A}_I \cup \mathcal{A}_{III}$ . As a result, we only consider the case of  $1 \in \mathcal{A}_I$  for the analysis of  $\alpha_H = 1$ , because if  $1 \in \mathcal{A}_{III}$ , i.e.,  $c(1) > p$ , offering any premium plan with  $\alpha_H = 1$  can only cause the OEM to lose money, and must be suboptimal.

Therefore, for any given  $\alpha_L$  and  $\Delta r$  s.t.  $(\boldsymbol{\alpha}_M, \mathbf{r}_M) \in \mathcal{M}'$ ,  $\Pi(\boldsymbol{\alpha}_M, \mathbf{r}_M) |_{\alpha_H=1}$  is maximized at  $r_H = p$ . Furthermore,  $\Pi(\boldsymbol{\alpha}_M, \mathbf{r}_M) |_{\alpha_H=1, r_H=p} = \frac{1}{\Delta e(1-\alpha_L)} [ -(\Delta r)^2 + (c(1) - c(\alpha_L)) \cdot \Delta r ] + p - c(1)$ .

- If  $c'(0) > 2\Delta e$ , then since  $c''(\cdot) \geq 0$ , there must be  $c(\alpha) - 2\alpha\Delta e$  is increasing on  $\alpha \in [0, 1]$ . Hence we have  $c(\alpha_L) - 2\alpha_L\Delta e \leq c(1) - 2\Delta e$ , which implies  $\Delta e(1 - \alpha_L) \leq \frac{c(1) - c(\alpha_L)}{2}$ . As a result,  $\Pi(\boldsymbol{\alpha}_M, \mathbf{r}_M) |_{\alpha_H=1, r_H=p}$  is maximized at  $\Delta r = \Delta e \cdot (1 - \alpha_L)$  (i.e.,  $r_L = p - \Delta e \cdot (1 - \alpha_L)$ ) with  $\Pi(\boldsymbol{\alpha}_M, \mathbf{r}_M) |_{\alpha_H=1, r_H=p, r_L=p-\Delta e \cdot (1-\alpha_L)} = f(\alpha_L)$ .
- If  $c'(1) < 2\Delta e$ , then since  $c''(\cdot) \geq 0$ , there must be  $c(\alpha) - 2\alpha\Delta e$  is decreasing on  $\alpha \in [0, 1]$ . Hence we have  $c(\alpha_L) - 2\alpha_L\Delta e \geq c(1) - 2\Delta e$ , which implies  $\Delta e(1 - \alpha_L) \geq \frac{c(1) - c(\alpha_L)}{2}$ . As a

result,  $\Pi(\boldsymbol{\alpha}_M, \mathbf{r}_M) |_{\alpha_H=1, r_H=p}$  is maximized at  $\Delta r = \frac{c(1)-c(\alpha_L)}{2}$  (i.e.,  $r_L = p - \frac{c(1)-c(\alpha_L)}{2}$ ) with  $\Pi(\boldsymbol{\alpha}_M, \mathbf{r}_M) |_{\alpha_H=1, r_H=p, r_L=p-\frac{c(1)-c(\alpha_L)}{2}} = \frac{1}{4\Delta e} \cdot \frac{(c(1)-c(\alpha_L))^2}{1-\alpha_L} + p - c(1)$ .

– If  $c'(0) \leq 2\Delta e \leq c'(1)$ , then  $c(\alpha) - 2\alpha\Delta e$  first decreases and then increases in  $\alpha$  on  $[0, 1]$ .

\* If  $c(1) \geq 2\Delta e$ , then we have  $c(\alpha_L) - 2\alpha_L\Delta e \leq c(1) - 2\Delta e$  for  $\alpha_L \in [0, 1]$ , which implies  $\Delta e(1 - \alpha_L) \leq \frac{c(1)-c(\alpha_L)}{2}$ . With similar analysis as for the case of  $c'(0) > 2\Delta e$ , OEM's profit in this case is maximized at  $\Pi(\boldsymbol{\alpha}_M, \mathbf{r}_M) |_{\alpha_H=1, r_H=p, r_L=p-\Delta e \cdot (1-\alpha_L)} = f(\alpha_L)$ .

\* If  $c(1) < 2\Delta e$ , then there exists  $\tilde{\alpha} \in [0, 1)$  such that  $c(\tilde{\alpha}) - 2\tilde{\alpha}\Delta e = c(1) - 2\Delta e$ .

For  $\alpha_L \in [0, \tilde{\alpha}]$ ,  $c(\alpha_L) - 2\alpha_L\Delta e \geq c(1) - 2\Delta e$ , which implies  $\frac{c(1)-c(\alpha_L)}{1-\alpha_L} \leq 2\Delta e$ .

Following similar analysis as for the case of  $c'(1) < 2\Delta e$ , given such  $\alpha_L$ , the OEM's profit is maximized at  $\Pi(\boldsymbol{\alpha}_M, \mathbf{r}_M) |_{\alpha_H=1, r_H=p, r_L=p-\frac{c(1)-c(\alpha_L)}{2}} = \frac{1}{4\Delta e} \cdot \frac{[c(1)-c(\alpha_L)]^2}{1-\alpha_L} + p - c(1)$ .

For  $\alpha_L \in [\tilde{\alpha}, 1]$ ,  $c(\alpha_L) - 2\alpha_L\Delta e \leq c(1) - 2\Delta e$ , which implies  $\Delta e(1 - \alpha_L) \leq \frac{c(1)-c(\alpha_L)}{2}$ .

With similar analysis as for the case of  $c'(0) > 2\Delta e$ , OEM's profit in this case is maximized at  $\Pi(\boldsymbol{\alpha}_M, \mathbf{r}_M) |_{\alpha_H=1, r_H=p, r_L=p-\Delta e \cdot (1-\alpha_L)} = f(\alpha_L)$ .

We can further consolidate the above cases into the following:

– If  $c(1) \geq 2\Delta e$ , the OEM's profit in this case is maximized at

$$\Pi(\boldsymbol{\alpha}_M, \mathbf{r}_M) |_{\alpha_H=1, r_H=p, r_L=p-\Delta e \cdot (1-\alpha_L)} = f(\alpha_L).$$

– If  $c(1) < 2\Delta e$ , redefine (with slight abuse of notation)  $\tilde{\alpha} := \operatorname{argmin}\{\alpha \in [0, 1] \mid c(\alpha) - 2\alpha\Delta e = c(1) - 2\Delta e\}$ .

For  $\alpha_L \in [0, \tilde{\alpha}]$ , the OEM's profit is maximized at

$\Pi(\boldsymbol{\alpha}_M, \mathbf{r}_M) |_{\alpha_H=1, r_H=p, r_L=p-\frac{c(1)-c(\alpha_L)}{2}} = \frac{1}{4\Delta e} \cdot \frac{[c(1)-c(\alpha_L)]^2}{1-\alpha_L} + p - c(1) \geq f(\alpha_L)$ , where the inequality can be verified through simple algebra. Note that  $\frac{1}{4\Delta e} \cdot \frac{[c(1)-c(\alpha_L)]^2}{1-\alpha_L} + p - c(1) = \left( f(\alpha_H) + \frac{1}{4\Delta e} \cdot \frac{(\Delta c)^2}{\Delta \alpha} \right) |_{\alpha_H=1}$ . Also, recall that we only need to consider  $\alpha_L \in \mathcal{A}_I \cup \mathcal{A}_{II}$  to avoid negative profit for the OEM, and that  $\frac{c(1)-c(\alpha_L)}{1-\alpha_L} \leq 2\Delta e$  for  $\alpha_L \in [0, \tilde{\alpha}]$ . Therefore, we must have  $\max_{\alpha_L \in [0, \tilde{\alpha}] \cap (\mathcal{A}_I \cup \mathcal{A}_{II})} \left( \frac{1}{4\Delta e} \cdot \frac{[c(1)-c(\alpha_L)]^2}{1-\alpha_L} + p - c(1) \right) \leq \max_{\alpha_L \in \mathcal{A}_I \cup \mathcal{A}_{II}, \alpha_H \in \mathcal{A}_I} \left( f(\alpha_H) + \frac{1}{4\Delta e} \cdot \frac{(\Delta c)^2}{\Delta \alpha} \right)$  with  $1 \in \mathcal{A}_I$ .

For  $\alpha_L \in [\tilde{\alpha}, 1]$ , the OEM's profit is maximized at

$$\Pi(\boldsymbol{\alpha}_M, \mathbf{r}_M) |_{\alpha_H=1, r_H=p, r_L=p-\Delta e \cdot (1-\alpha_L)} = f(\alpha_L).$$

- For  $\alpha_H \in (\alpha_L, 1)$

$$\Pi(\alpha_M, \mathbf{r}_M) = \begin{cases} \frac{1}{\Delta e} \cdot \frac{-r_H^2 + (p+c(\alpha_H)) \cdot r_H + \frac{1-\alpha_H}{\Delta\alpha} \cdot [-(\Delta r)^2 + \Delta c \cdot \Delta r] - p \cdot c(\alpha_H)}{1-\alpha_H}, & \text{if } p - \Delta e \cdot (1 - \alpha_H) \leq r_H \leq p - \frac{1-\alpha_H}{\Delta\alpha} \Delta r; \\ r_H - c(\alpha_H) + \frac{1}{\Delta\alpha\Delta e} \cdot [-(\Delta r)^2 + \Delta c \cdot \Delta r], & \text{if } r_H \leq p - \Delta e \cdot (1 - \alpha_H). \end{cases}$$

which is increasing in  $r_H$  for any given  $\Delta r \leq \Delta e \cdot \Delta\alpha$  and  $r_H \leq p - \Delta e \cdot (1 - \alpha_H)$ . Therefore, we only need to consider the region  $p - \Delta e \cdot (1 - \alpha_H) \leq r_H \leq p - \frac{1-\alpha_H}{\Delta\alpha} \Delta r$ .

Specifically, for  $\Delta r \leq \Delta e \cdot \Delta\alpha$  and  $r_H \in [p - \Delta e \cdot (1 - \alpha_H), p - \frac{1-\alpha_H}{\Delta\alpha} \Delta r]$ ,

$$\begin{aligned} & \Pi(\alpha_M, \mathbf{r}_M) \\ &= \frac{1}{\Delta e} \cdot \frac{-\left(r_H - \frac{p+c(\alpha_H)}{2}\right)^2 + \frac{(p-c(\alpha_H))^2}{4} + \frac{1-\alpha_H}{\Delta\alpha} \cdot \left[-\left(\Delta r - \frac{\Delta c}{2}\right)^2 + \frac{(\Delta c)^2}{4}\right]}{1-\alpha_H}. \end{aligned}$$

–  $\alpha_H \in \mathcal{A}_I \cap (\alpha_L, 1)$ ,

i.e.,  $\frac{p-c(\alpha_H)}{1-\alpha_H} \geq 2\Delta e$ , we have  $\frac{p+c(\alpha_H)}{2} \leq p - \Delta e \cdot (1 - \alpha_H)$ .

For any given  $\Delta r \leq \Delta e \cdot \Delta\alpha$ ,  $\Pi(\alpha_M, \mathbf{r}_M)$  is maximized at  $r_H = p - \Delta e \cdot (1 - \alpha_H)$  with

$$\begin{aligned} & \Pi(\alpha_M, \mathbf{r}_M) \Big|_{r_H=p-\Delta e \cdot (1-\alpha_H)} \\ &= \frac{1}{\Delta e} \cdot \frac{-\left(\frac{p-c(\alpha_H)}{2} - \Delta e(1-\alpha_H)\right)^2 + \frac{(p-c(\alpha_H))^2}{4} + \frac{1-\alpha_H}{\Delta\alpha} \cdot \left[-\left(\Delta r - \frac{\Delta c}{2}\right)^2 + \frac{(\Delta c)^2}{4}\right]}{1-\alpha_H}. \end{aligned}$$

\* If  $\frac{\Delta c}{\Delta\alpha} \geq 2\Delta e$ ,  $\Pi(\alpha_M, \mathbf{r}_M) \Big|_{r_H=p-\Delta e \cdot (1-\alpha_H)}$  is maximized at  $\Delta r = \Delta e \cdot \Delta\alpha$ , i.e.,  $r_L = p - \Delta e \cdot (1 - \alpha_L)$  with

$$\Pi(\alpha_M, \mathbf{r}_M) \Big|_{r_H=p-\Delta e \cdot (1-\alpha_H), r_L=p-\Delta e \cdot (1-\alpha_L)} = f(\alpha_L).$$

\* If  $\frac{\Delta c}{\Delta\alpha} \leq 2\Delta e$ ,  $\Pi(\alpha_M, \mathbf{r}_M) \Big|_{r_H=p-\Delta e \cdot (1-\alpha_H)}$  is maximized at  $\Delta r = \frac{\Delta c}{2}$ , i.e.,  $r_L = p - \Delta e \cdot (1 - \alpha_H) - \frac{\Delta c}{2} (= p - \Delta e \cdot (1 - \alpha_L) + \Delta e \Delta\alpha - \frac{\Delta c}{2})$  with

$$\begin{aligned} & \Pi(\alpha_M, \mathbf{r}_M) \Big|_{r_H=p-\Delta e \cdot (1-\alpha_H), r_L=p-\Delta e \cdot (1-\alpha_H) - \frac{\Delta c}{2}} \\ &= f(\alpha_H) + \frac{1}{4\Delta e} \cdot \frac{(\Delta c)^2}{\Delta\alpha} = f(\alpha_L) + \frac{(2\Delta e \cdot \Delta\alpha - \Delta c)^2}{4\Delta e \cdot \Delta\alpha} \geq f(\alpha_L). \end{aligned}$$

–  $\alpha_H \in \mathcal{A}_{II} \cap (\alpha_L, 1)$ ,

i.e.,  $0 \leq \frac{p-c(\alpha_H)}{1-\alpha_H} \leq 2\Delta e$ , we have  $\frac{p+c(\alpha_H)}{2} \geq p - \Delta e \cdot (1 - \alpha_H)$ .

\* On the region  $\Delta r \leq \frac{\Delta\alpha}{2} \cdot \frac{p-c(\alpha_H)}{1-\alpha_H}$ , there is  $p - \frac{1-\alpha_H}{\Delta\alpha} \Delta r \geq \frac{p+c(\alpha_H)}{2}$ , and  $\Pi(\alpha_M, \mathbf{r}_M)$  is maximized at  $r_H = \frac{p+c(\alpha_H)}{2}$  with

$$\Pi(\alpha_M, \mathbf{r}_M) \Big|_{r_H=\frac{p+c(\alpha_H)}{2}} = \frac{1}{\Delta e} \cdot \frac{\frac{(p-c(\alpha_H))^2}{4} + \frac{1-\alpha_H}{\Delta\alpha} \cdot \left[-\left(\Delta r - \frac{\Delta c}{2}\right)^2 + \frac{(\Delta c)^2}{4}\right]}{1-\alpha_H}.$$

• If  $\frac{p-c(\alpha_H)}{1-\alpha_H} \leq \frac{p-c(\alpha_L)}{1-\alpha_L}$ , there is  $\frac{\Delta\alpha}{2} \cdot \frac{p-c(\alpha_H)}{1-\alpha_H} \leq \frac{\Delta c}{2}$ . Thus  $\Pi(\alpha_M, \mathbf{r}_M) \Big|_{r_H=\frac{p+c(\alpha_H)}{2}}$  is maximized at  $\Delta r = \frac{\Delta\alpha}{2} \cdot \frac{p-c(\alpha_H)}{1-\alpha_H}$ , i.e.,  $r_L = \frac{p+c(\alpha_H)}{2} - \frac{\Delta\alpha}{2} \cdot \frac{p-c(\alpha_H)}{1-\alpha_H} = \frac{p}{2} +$

$\frac{(1-\alpha_L)c(\alpha_H)-p\cdot\Delta\alpha}{2(1-\alpha_H)}$  with

$$\begin{aligned} & \Pi(\boldsymbol{\alpha}_M, \mathbf{r}_M) \Big|_{r_H=\frac{p+c(\alpha_H)}{2}, r_L=\frac{p}{2}+\frac{(1-\alpha_L)c(\alpha_H)-p\cdot\Delta\alpha}{2(1-\alpha_H)}} \\ &= \frac{1}{4\Delta e} \cdot \frac{p-c(\alpha_H)}{1-\alpha_H} \cdot \left[ p-c(\alpha_L) - \frac{p-c(\alpha_H)}{1-\alpha_H} \cdot \Delta\alpha + \Delta c \right] \\ &\leq \frac{1}{4\Delta e} \cdot \frac{(p-c(\alpha_L))^2}{1-\alpha_L} = g(\alpha_L), \end{aligned}$$

where the inequality can be shown as following: let  $x = \frac{p-c(\alpha_H)}{1-\alpha_H}$  and  $y = \frac{p-c(\alpha_L)}{1-\alpha_L}$ , then there is  $\Delta c = (1-\alpha_L)y - (1-\alpha_H)x$ , and as a result, there are

$$\begin{aligned} & \frac{p-c(\alpha_H)}{1-\alpha_H} \cdot \left[ p-c(\alpha_L) - \frac{p-c(\alpha_H)}{1-\alpha_H} \cdot \Delta\alpha + \Delta c \right] \\ &= (1-\alpha_L)(2xy - x^2) \leq (1-\alpha_L)y^2 = \frac{(p-c(\alpha_L))^2}{1-\alpha_L}. \end{aligned}$$

Moreover, since  $\alpha_H \in \mathcal{A}_{II} \cap (\alpha_L, 1)$ , i.e.,  $x \leq 2\Delta e$ , there is  $\frac{1}{4\Delta e} \cdot (1-\alpha_L)(2xy - x^2) = \frac{1}{4\Delta e} \cdot (1-\alpha_L) \cdot (-(x-y)^2 + y^2) \leq \frac{1}{4\Delta e} \cdot (1-\alpha_L) \cdot (-(2\Delta e - y)^2 + y^2) = f(\alpha_L)$ , where the inequality holds when  $y = \frac{p-c(\alpha_L)}{1-\alpha_L} \geq 2\Delta e$ .

• If  $\frac{p-c(\alpha_H)}{1-\alpha_H} \geq \frac{p-c(\alpha_L)}{1-\alpha_L}$ , there is  $\frac{\Delta\alpha}{2} \cdot \frac{p-c(\alpha_H)}{1-\alpha_H} \geq \frac{\Delta c}{2}$ . Thus  $\Pi(\boldsymbol{\alpha}_M, \mathbf{r}_M) \Big|_{r_H=\frac{p+c(\alpha_H)}{2}}$  is maximized at  $\Delta r = \frac{\Delta c}{2}$ , i.e.,  $r_H = \frac{p+c(\alpha_H)}{2} (= p - \frac{1-\alpha_H}{2} \cdot \frac{p-c(\alpha_L)}{1-\alpha_L} - \frac{1-\alpha_H}{2} \cdot (\frac{p-c(\alpha_H)}{1-\alpha_H} - \frac{p-c(\alpha_L)}{1-\alpha_L}))$ ,  $r_L = \frac{p+c(\alpha_L)}{2}$  with

$$\begin{aligned} & \Pi(\boldsymbol{\alpha}_M, \mathbf{r}_M) \Big|_{r_H=\frac{p+c(\alpha_H)}{2}, r_L=\frac{p+c(\alpha_L)}{2}} \\ &= \frac{1}{4\Delta e} \cdot \left( \frac{(p-c(\alpha_H))^2}{1-\alpha_H} + \frac{(\Delta c)^2}{\Delta\alpha} \right) \\ &= g(\alpha_H) + \frac{1}{4\Delta e} \cdot \frac{(\Delta c)^2}{\Delta\alpha} = g(\alpha_L) + \frac{(1-\alpha_H)(1-\alpha_L)(x-y)^2}{4\Delta e\Delta\alpha} \geq g(\alpha_L), \end{aligned}$$

where the inequality is due to  $\frac{(p-c(\alpha_H))^2}{1-\alpha_H} + \frac{(\Delta c)^2}{\Delta\alpha} = (1-\alpha_H)x^2 + \frac{(\Delta c)^2}{\Delta\alpha} \geq (1-\alpha_L)y^2$ , which can be verified by plugging in  $\Delta c = (1-\alpha_L)y - (1-\alpha_H)x$ .

\* On the region  $\Delta r \in [\frac{\Delta\alpha}{2} \cdot \frac{p-c(\alpha_H)}{1-\alpha_H}, \Delta e \cdot \Delta\alpha]$ , there is  $p - \frac{1-\alpha_H}{\Delta\alpha} \Delta r \leq \frac{p+c(\alpha_H)}{2}$ , and  $\Pi(\boldsymbol{\alpha}_M, \mathbf{r}_M)$  is maximized at  $r_H = p - \frac{1-\alpha_H}{\Delta\alpha} \Delta r$  with

$$\begin{aligned} & \Pi(\boldsymbol{\alpha}_M, \mathbf{r}_M) \Big|_{r_H=p-\frac{1-\alpha_H}{\Delta\alpha}\Delta r} = \frac{\Delta r}{\Delta e\Delta\alpha} \cdot \left[ -\Delta r \cdot \frac{1-\alpha_L}{\Delta\alpha} + p-c(\alpha_L) \right] \\ &= \frac{(1-\alpha_L)}{\Delta e \cdot (\Delta\alpha)^2} \left[ -\left( \Delta r - \frac{\Delta\alpha}{2} \cdot \frac{p-c(\alpha_L)}{1-\alpha_L} \right)^2 + \left( \frac{\Delta\alpha}{2} \right)^2 \left( \frac{p-c(\alpha_L)}{1-\alpha_L} \right)^2 \right]. \end{aligned}$$

• If  $\frac{p-c(\alpha_H)}{1-\alpha_H} \leq \frac{p-c(\alpha_L)}{1-\alpha_L} \leq 2\Delta e$ , then  $\Pi(\boldsymbol{\alpha}_M, \mathbf{r}_M) \Big|_{r_H=p-\frac{1-\alpha_H}{\Delta\alpha}\Delta r}$  is maximized at  $\Delta r = \frac{\Delta\alpha}{2} \cdot \frac{p-c(\alpha_L)}{1-\alpha_L}$ , i.e.,  $r_H = p - \frac{1-\alpha_H}{2} \cdot \frac{p-c(\alpha_L)}{1-\alpha_L} = \frac{p}{2} \cdot \left( 1 + \frac{\Delta\alpha}{1-\alpha_L} \right) + \frac{1-\alpha_H}{1-\alpha_L} \cdot \frac{c(\alpha_L)}{2}$ ,  $r_L = p - \frac{1-\alpha_L}{2} \cdot \frac{p-c(\alpha_L)}{1-\alpha_L} = \frac{p+c(\alpha_L)}{2}$  with

$$\Pi(\boldsymbol{\alpha}_M, \mathbf{r}_M) \Big|_{r_H=p-\frac{1-\alpha_H}{2} \cdot \frac{p-c(\alpha_L)}{1-\alpha_L}, r_L=\frac{p+c(\alpha_L)}{2}} = g(\alpha_L) \geq f(\alpha_L),$$

where the inequality can be verified via simple algebra.

- If  $\frac{p-c(\alpha_H)}{1-\alpha_H} \leq 2\Delta e \leq \frac{p-c(\alpha_L)}{1-\alpha_L}$ , then  $\Pi(\boldsymbol{\alpha}_M, \mathbf{r}_M) \big|_{r_H=p-\frac{1-\alpha_H}{\Delta\alpha}\Delta r}$  is maximized at  $\Delta r = \Delta e \cdot \Delta\alpha$ , i.e.,  $r_H = p - \Delta e(1 - \alpha_H)$ ,  $r_L = p - \Delta e(1 - \alpha_L)$  with

$$\Pi(\boldsymbol{\alpha}_M, \mathbf{r}_M) \big|_{r_H=p-\Delta e(1-\alpha_H), r_L=p-\Delta e(1-\alpha_L)} = f(\alpha_L).$$

- If  $\frac{p-c(\alpha_L)}{1-\alpha_L} \leq \frac{p-c(\alpha_H)}{1-\alpha_H} \leq 2\Delta e$ , then  $\Pi(\boldsymbol{\alpha}_M, \mathbf{r}_M) \big|_{r_H=p-\frac{1-\alpha_H}{\Delta\alpha}\Delta r}$  is maximized at  $\Delta r = \frac{\Delta\alpha}{2} \cdot \frac{p-c(\alpha_H)}{1-\alpha_H}$ , i.e.,  $r_H = \frac{p+c(\alpha_H)}{2}$ ,  $r_L = \frac{p}{2} - \frac{p \cdot \Delta\alpha - c(\alpha_H)(1-\alpha_L)}{2(1-\alpha_H)}$  with

$$\begin{aligned} & \Pi(\boldsymbol{\alpha}_M, \mathbf{r}_M) \big|_{r_H=\frac{p+c(\alpha_H)}{2}, r_L=\frac{p}{2}-\frac{p \cdot \Delta\alpha - c(\alpha_H)(1-\alpha_L)}{2(1-\alpha_H)}} \\ &= \frac{1-\alpha_L}{4\Delta e} \cdot \frac{p-c(\alpha_H)}{1-\alpha_H} \cdot \left[ \frac{2(p-c(\alpha_L))}{1-\alpha_L} - \frac{p-c(\alpha_H)}{1-\alpha_H} \right] \\ &\leq g(\alpha_H) + \frac{1}{4\Delta e} \cdot \frac{(\Delta e)^2}{\Delta\alpha}, \end{aligned}$$

where the inequality can be verified with simple algebra after plugging in  $x =$

$$\frac{p-c(\alpha_H)}{1-\alpha_H}, y = \frac{p-c(\alpha_L)}{1-\alpha_L}, \text{ and } \Delta c = (1-\alpha_L)y - (1-\alpha_H)x.$$

- $\alpha_H \in \mathcal{A}_{III} \cap (\alpha_L, 1)$ , where  $\mathcal{A}_{III} = \{\alpha \in [0, 1] \mid p - c(\alpha) < 0\}$ . We have  $\frac{p+c(\alpha_H)}{2} > p \geq p - \frac{1-\alpha_H}{\Delta\alpha}\Delta r$ , and  $\Pi(\boldsymbol{\alpha}_M, \mathbf{r}_M)$  is maximized at  $r_H = p - \frac{1-\alpha_H}{\Delta\alpha}\Delta r$  with

$$\Pi(\boldsymbol{\alpha}_M, \mathbf{r}_M) \big|_{r_H=p-\frac{1-\alpha_H}{\Delta\alpha}\Delta r} = \frac{1-\alpha_L}{\Delta e \cdot (\Delta\alpha)^2} \left[ - \left( \Delta r - \frac{\Delta\alpha}{2} \cdot \frac{p-c(\alpha_L)}{1-\alpha_L} \right)^2 + \left( \frac{\Delta\alpha}{2} \right)^2 \left( \frac{p-c(\alpha_L)}{1-\alpha_L} \right)^2 \right].$$

- If  $\frac{p-c(\alpha_L)}{1-\alpha_L} \leq 2\Delta e$ , and thus  $\Pi(\boldsymbol{\alpha}_M, \mathbf{r}_M) \big|_{r_H=p-\frac{1-\alpha_H}{\Delta\alpha}\Delta r}$  is maximized at  $\Delta r = \frac{\Delta\alpha}{2} \cdot \frac{p-c(\alpha_L)}{1-\alpha_L}$ , i.e.,  $r_H = p - \frac{1-\alpha_H}{2} \cdot \frac{p-c(\alpha_L)}{1-\alpha_L} = \frac{p}{2} \cdot \left( 1 + \frac{\Delta\alpha}{1-\alpha_L} \right) + \frac{1-\alpha_H}{1-\alpha_L} \cdot \frac{c(\alpha_L)}{2}$ ,  $r_L = p - \frac{1-\alpha_L}{2} \cdot \frac{p-c(\alpha_L)}{1-\alpha_L} = \frac{p+c(\alpha_L)}{2}$  with  $\Pi(\boldsymbol{\alpha}_M, \mathbf{r}_M) \big|_{r_H=p-\frac{1-\alpha_H}{2} \cdot \frac{p-c(\alpha_L)}{1-\alpha_L}, r_L=\frac{p+c(\alpha_L)}{2}} = g(\alpha_L) \geq f(\alpha_L)$ , where the inequality can be verified via simple algebra.

- If  $\frac{p-c(\alpha_L)}{1-\alpha_L} \geq 2\Delta e$ , and thus  $\Pi(\boldsymbol{\alpha}_M, \mathbf{r}_M) \big|_{r_H=p-\frac{1-\alpha_H}{\Delta\alpha}\Delta r}$  is maximized at  $\Delta r = \Delta e \cdot \Delta\alpha$ , i.e.,  $r_H = p - \Delta e(1 - \alpha_H)$ ,  $r_L = p - \Delta e(1 - \alpha_L)$  with  $\Pi(\boldsymbol{\alpha}_M, \mathbf{r}_M) \big|_{r_H=p-\Delta e(1-\alpha_H), r_L=p-\Delta e(1-\alpha_L)} = f(\alpha_L)$ .

Consolidating the above cases, the optimal package and profit can be obtained as in Theorem [7](#).  $\square$

**Proof. (Corollary [4](#))** By Theorem [5](#), conditions in Corollary [4](#) (i) and (ii) both imply that the optimal package can only be two-item. For (i), the optimal package is  $(\boldsymbol{\alpha}_M^I, \mathbf{r}_M^I)$ , and the rental price given by [\(62\)](#) can be further simplified as  $\mathbf{r}_M^I = (p - \Delta e \cdot (1 - \alpha_H^I) - \frac{\Delta c^I}{2}, p - \Delta e \cdot (1 - \alpha_H^I))$ . For (ii), the optimal package is  $(\boldsymbol{\alpha}_M^{II}, \mathbf{r}_M^{II})$  and [\(64\)](#) can be further simplified as  $\mathbf{r}_M^{II} = (\frac{p+c(\alpha_L^{II})}{2}, \frac{p+c(\alpha_H^{II})}{2})$ . The prosumer utility is obtained by plugging the optimal package into [\(1\)](#).  $\square$

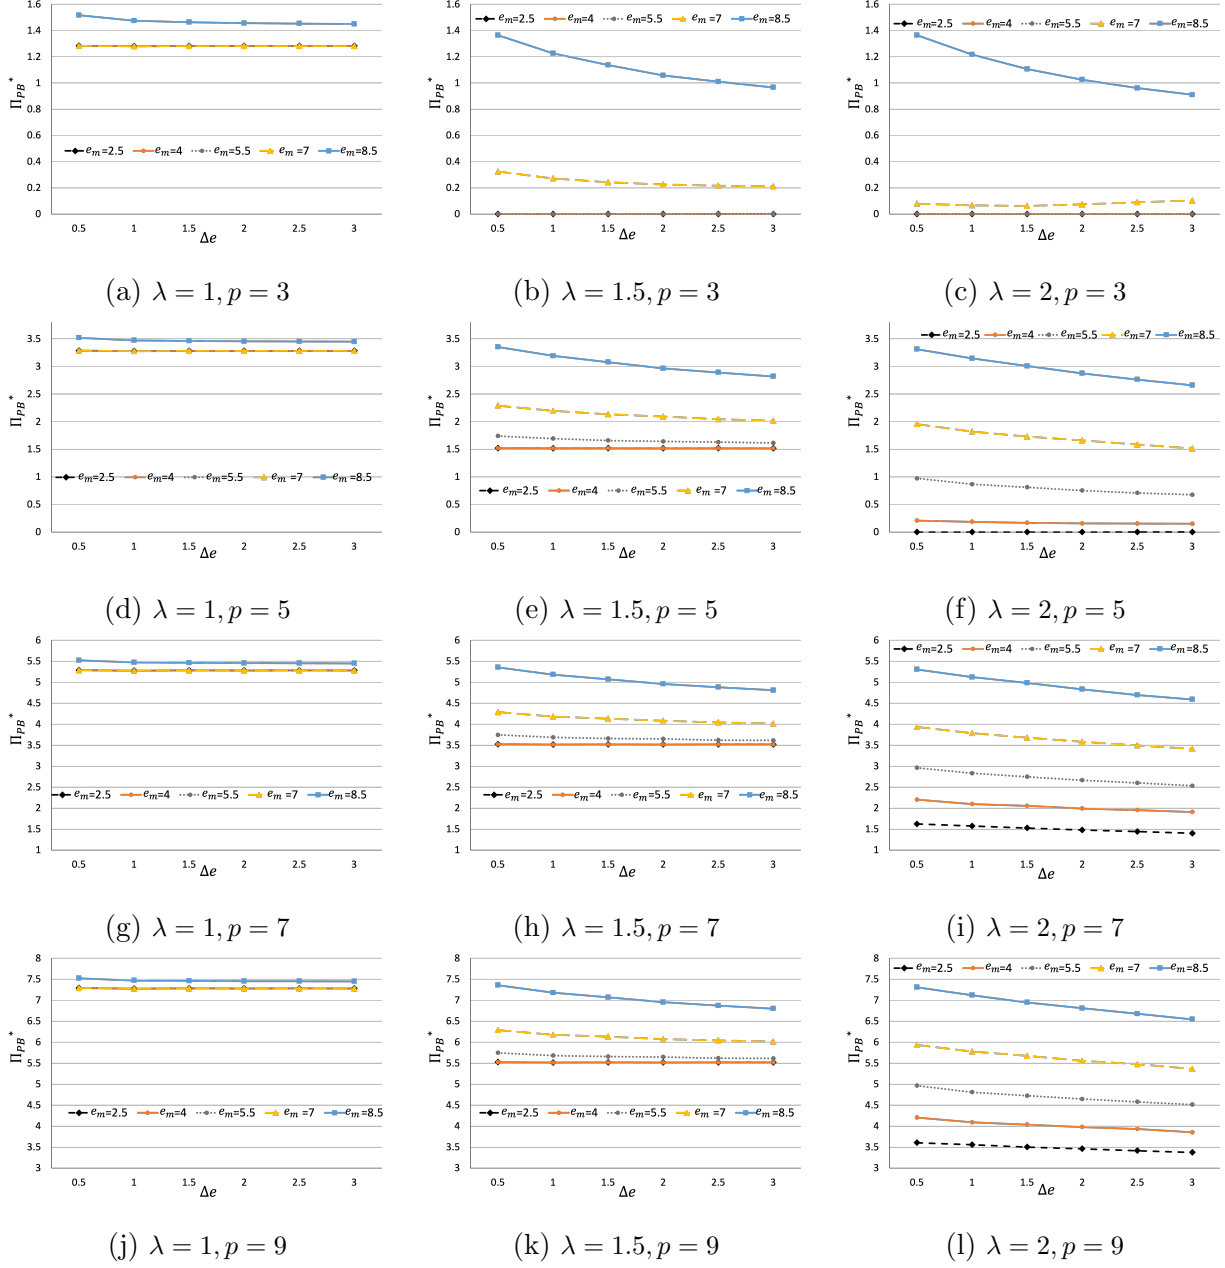

Figure 8: Impact of  $\Delta e$  and  $e_m$  on OEM Profit under Optimal Population-based Package (Truncated Normal)

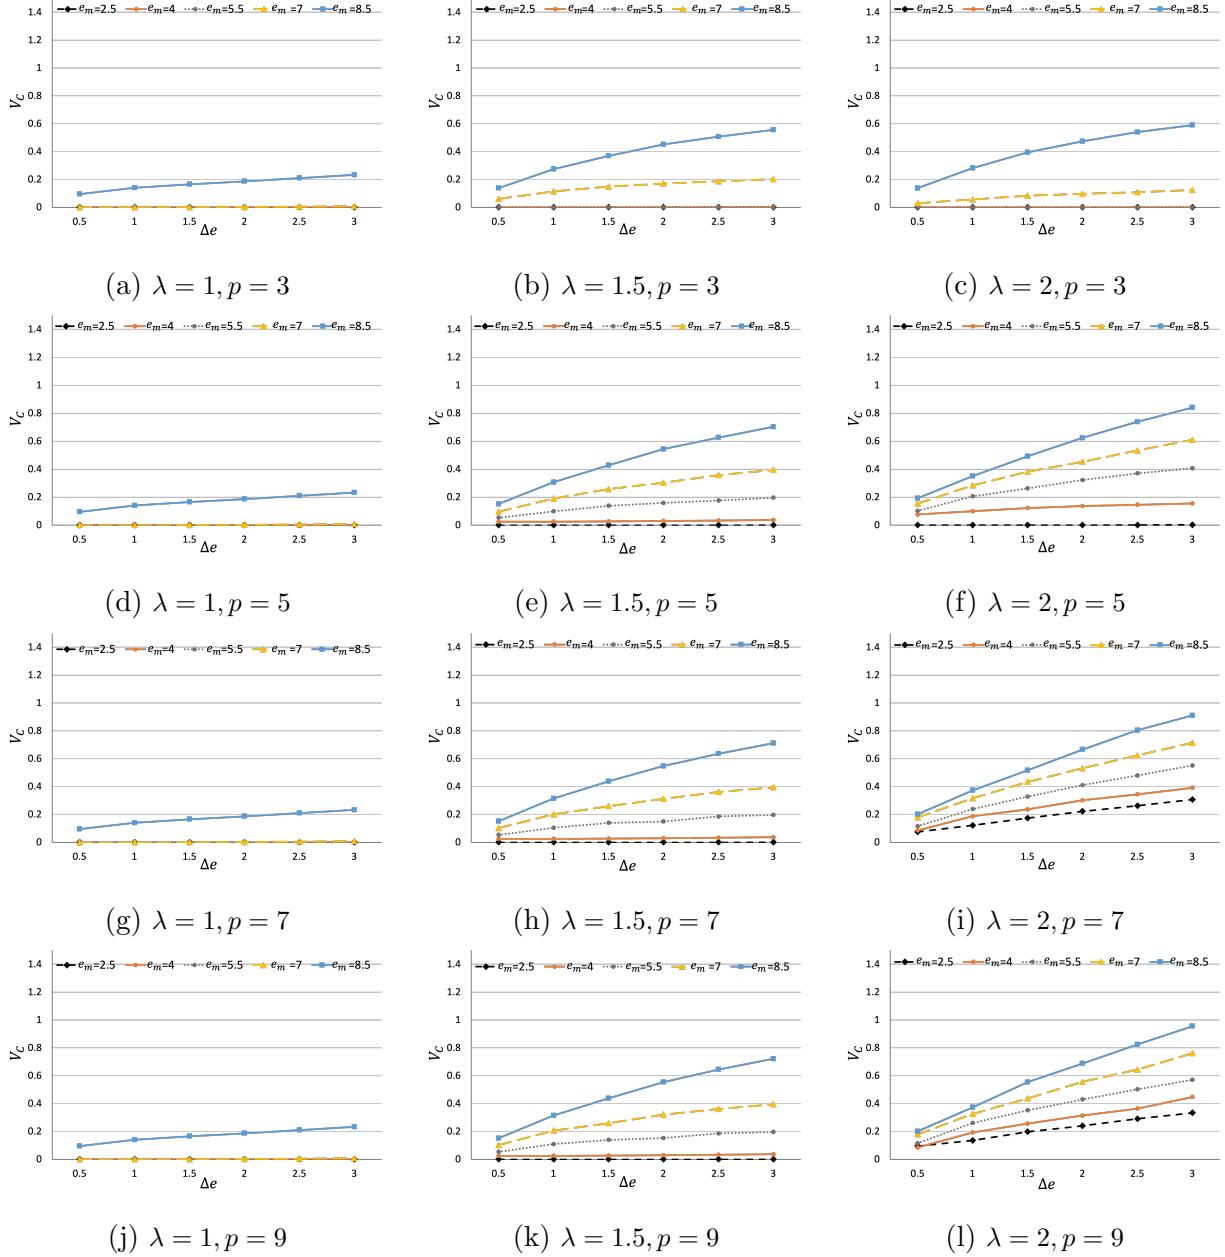

Figure 9: Impact of  $\Delta e$  and  $e_m$  on the Value of Customization (Truncated Normal)
